# Supplementary material for: A dinuclear iron complex as an efficient electrocatalyst for homogeneous water oxidation reaction
Source: Royal Society of Chemistry journal article supplement (doi:10.1039/d0cy00011f), 2020-01-01
Supplement: d0cy00011f1.pdf [file d0cy00011f1.pdf]

## *Supporting Information*

### **A dinuclear iron complex as an efficient electrocatalyst for homogeneous water oxidation reaction**

Suhana Karim,<sup>a</sup> Aratrika Chakraborty,<sup>a</sup> Debabrata Samanta,<sup>b</sup> Ennio Zangrando,<sup>c</sup>  
Totan Ghosh,<sup>d</sup> and Debasis Das<sup>\*,a</sup>

<sup>a</sup> *Department of Chemistry, University of Calcutta, India*

<sup>b</sup> *Department of Chemistry, Indian Institute of Technology, Kanpur, India*

<sup>c</sup> *Department of Chemical and Pharmaceutical Sciences. University of Trieste, Italy*

<sup>d</sup> *NetajiSubhas Institute of Technology, Patna, India*

\*Author to whom correspondence should be addressed. Email: dasdebasis2001@yahoo.com

### **Contents of Supporting Information**

|                |                                                                                                                                                                                                               |
|----------------|---------------------------------------------------------------------------------------------------------------------------------------------------------------------------------------------------------------|
| <b>Fig. S1</b> | <b>UV-Vis spectrum of the complex 1.</b>                                                                                                                                                                      |
| <b>Fig. S2</b> | <b>FT-IR spectrum of the complex 1.</b>                                                                                                                                                                       |
| <b>Fig. S3</b> | <b>ESI-MS spectrum of the complex 1 in acetonitrile.</b>                                                                                                                                                      |
| <b>Fig. S4</b> | <b>UV-Visible spectra of the complex under basic conditions, when the Cl ligands at the metal centres of the complex 1 were found replaced by OH anions.</b>                                                  |
| <b>Fig. S5</b> | <b>ESI-MS spectrum of the complex 1 under basic conditions, when the Cl ligands at the metal centres of the complex 1 were found replaced by OH. The corresponding intermediates have been characterized.</b> |

|                   |                                                                                                                                                                                                                                                                                                         |
|-------------------|---------------------------------------------------------------------------------------------------------------------------------------------------------------------------------------------------------------------------------------------------------------------------------------------------------|
| <b>Table S1</b>   | Crystallographic Data and Details of Refinement for complexes [(FeLCl) <sub>2</sub> O](FeCl <sub>4</sub> ) <sub>2</sub> ( <b>1</b> ) and [(FeLCl) <sub>2</sub> O]Cl <sub>2</sub> ( <b>2</b> ).                                                                                                          |
| <b>Table S2</b>   | Selected Bond Lengths (Å) and Angles (°) for complexes [(FeLCl) <sub>2</sub> O](FeCl <sub>4</sub> ) <sub>2</sub> ( <b>1</b> ) and [(FeLCl) <sub>2</sub> O]Cl <sub>2</sub> ( <b>2</b> ).                                                                                                                 |
| <b>Fig. S6</b>    | ORTEP view (ellipsoids at 50% probability) of the centrosymmetric complex cation [(FeLCl) <sub>2</sub> O] <sup>2+</sup> (C atoms not labeled for sake of clarity) and molecular structure with polyhedra around Fe ions.                                                                                |
| <b>Fig. S7</b>    | Powder XRD pattern of the <b>complex 1</b> (bulk) and the simulated one.                                                                                                                                                                                                                                |
| <b>Fig. S8</b>    | Overlay of LSVs of acetonitrile in presence (violet) and in absence (black) of 0.4 mM <b>complex 1</b> containing 15 mM aqueous NaOH and 100 mM tetrabutylammonium perchlorate as supporting electrolyte (GC working electrode, Pt counter electrode)                                                   |
| <b>Fig. S9</b>    | Cyclic Voltammetry (CV) of the <b>complex 1</b> (0.4 mM in ACN, scan rate: 0.1 V/s, GC working electrode, 0.1 M nBu <sub>4</sub> NClO <sub>4</sub> as a supporting electrolyte). Here we also take the CVs of blank (ACN only in the same medium), blank after washing the electrode without polishing. |
| <b>Fig. S10</b>   | Continuous 15 LSV scans of the catalyst (0.4 mM solution of <b>complex 1</b> in ACN with 15 M concentration of NaOH) (scan rate: 0.1 V/s, GC working electrode).                                                                                                                                        |
| <b>Fig. S10 C</b> | Linear Sweep Voltammetry (LSV) of 0.4 mM solution of complex with increasing concentration of NaOH.                                                                                                                                                                                                     |
| <b>Fig. S11</b>   | Dynamic light scattering experiment before and after electrolysis.                                                                                                                                                                                                                                      |
| <b>Fig. S12</b>   | Plot of the peak current of the Fe <sup>3+/2+</sup> process vs square root of the scan rates.                                                                                                                                                                                                           |
| <b>Fig. S13</b>   | Total accumulated charge during bulk electrolysis at 1.0 V vs Ag/AgCl on a 1.77 cm <sup>2</sup> Hg-pool electrode in ACN solution containing 15 mM of NaOH (0.4 mM <b>complex 1</b> ).                                                                                                                  |
| <b>Fig. S14</b>   | Total current generated during bulk electrolysis at 1.0 V vs Ag/AgCl on a Glassy Carbon (GC) electrode in ACN solution containing 15 mM of NaOH (0.4 mM <b>complex 1</b> ).                                                                                                                             |

|                       |                                                                                                                                                                                                                                     |
|-----------------------|-------------------------------------------------------------------------------------------------------------------------------------------------------------------------------------------------------------------------------------|
| <b>Fig. S15</b>       | Cyclic Voltammetry (CV) of the ligand (0.4 mM in ACN, scan rate: 0.1 V/s, GC working electrode, 0.1 M nBu <sub>4</sub> NClO <sub>4</sub> as a supporting electrolyte). The study suggests that the ligand system is redox inactive. |
| <b>Fig. S16</b>       | UV-VIS spectra of the <b>complex 1</b> in ACN medium (brown), bulkelectrolysis of the complex after 1220s (green) maintaining the electrolytic condition and bulk electrolysis of the complex after 2300s (red).                    |
| <b>Fig. S17</b>       | SEM images of the electrode (A) before bulk electrolysis and (B) after electrolysis.                                                                                                                                                |
| <b>Fig. S18</b>       | ORTEP view (ellipsoids at 50% probability) of centrosymmetric <b>complex</b> [(FeLCl) <sub>2</sub> O]Cl <sub>2</sub> ( <b>2</b> ) (Fe' at -x+1, -y+1, -z+1; lattice water molecules not shown).                                     |
| <b>Fig. S18A</b>      | LSV plot of newly synthesized anion replaced <b>complex 2</b> .                                                                                                                                                                     |
| <b>Fig. S19</b>       | Tafel plot of the complex maintaining the catalytic condition followed by voltammetry methodology.                                                                                                                                  |
| <b>Fig. S20, S20A</b> | X-ray photoelectron spectra (XPS) of the catalytic complex.<br>XPS spectra of Fe2p level in the purple ruby.                                                                                                                        |
| <b>Fig. S21</b>       | Impedance spectra of <b>complex 1</b> (green), electrical equivalent electrical circuit models used to explain the EIS response of the water oxidation reaction.                                                                    |
| <b>Fig. S22</b>       | M06-2X/6-31G(d) optimized geometries for the intermediates of electrocatalytic water oxidation by complex.                                                                                                                          |

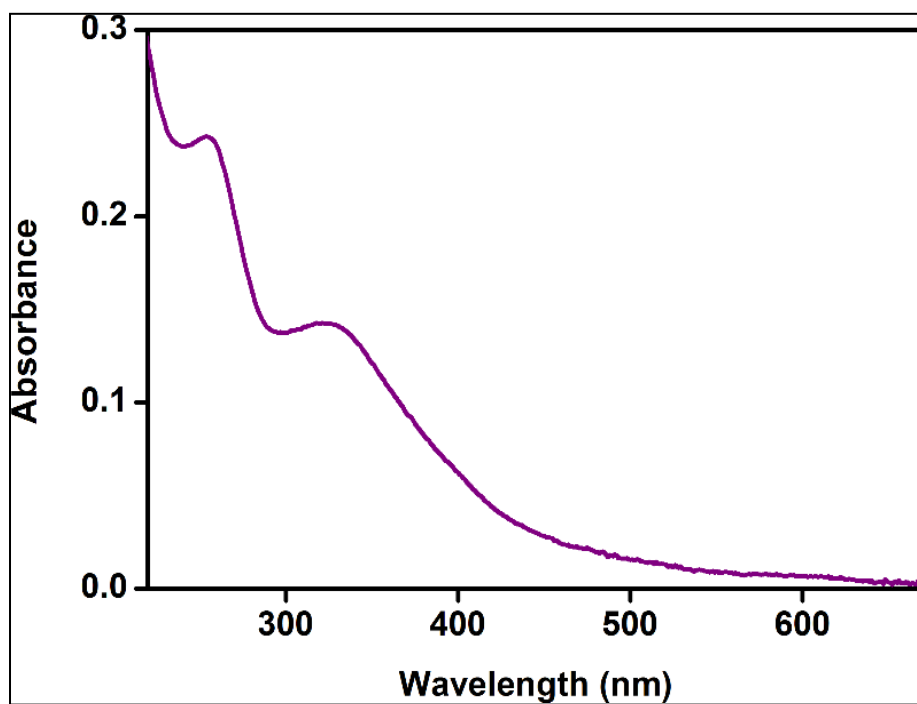

**Fig. S1** UV-visible spectrum of the **complex 1** in ACN.

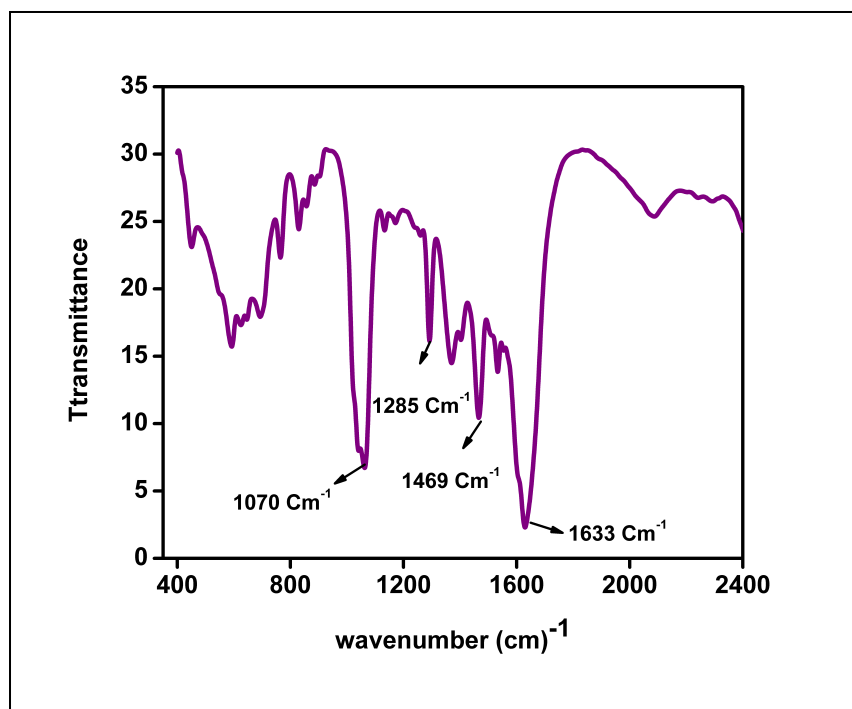

**Fig. S2** FT-IR spectrum of the **complex 1**.

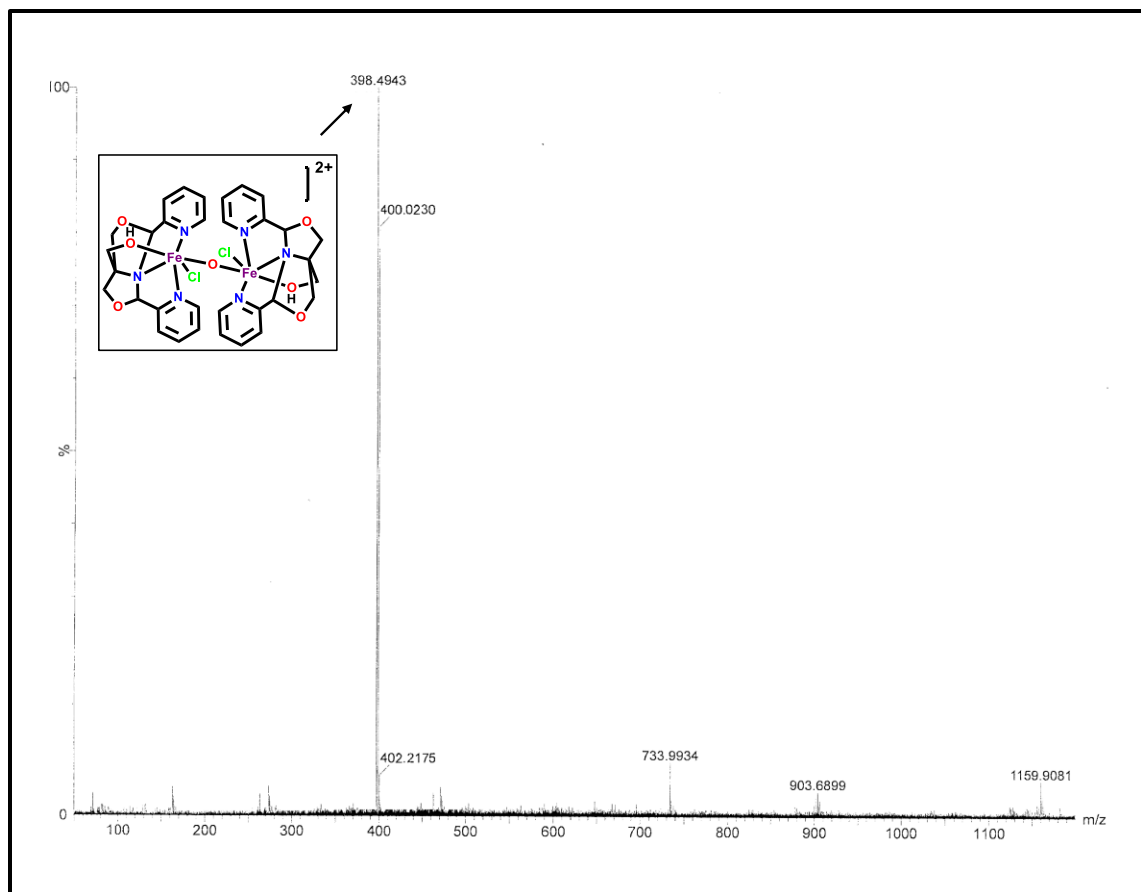

**Fig. S3** ESI-MS spectrum of the **complex 1** in ACN medium.

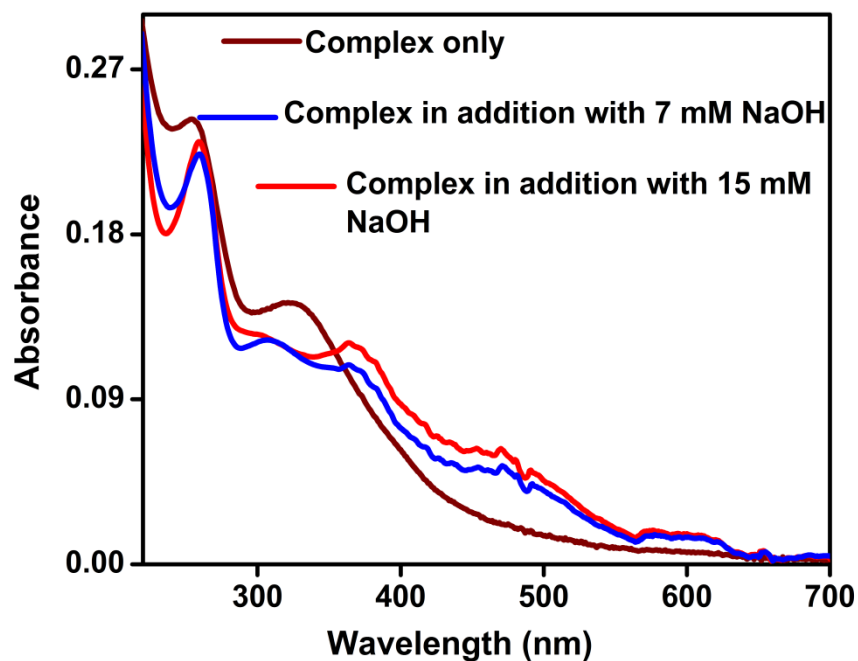

**Fig. S4** UV-visible spectra of the **complex 1** (brown) and of the **complex 1** under basic conditions, when the Cl ligands at the metal centres of the complex were found replaced by OH anions. The peak intensity increases with increasing the basic concentration. The transformation resulted in 43 nm red-shifting of UV-Vis band from 326 nm  $[(\text{FeLCl})_2\text{O}]^{2+}$  to 369 nm  $[(\text{FeLOH})_2\text{O}]^{2+}$ , which was also confirmed by DFT calculation.

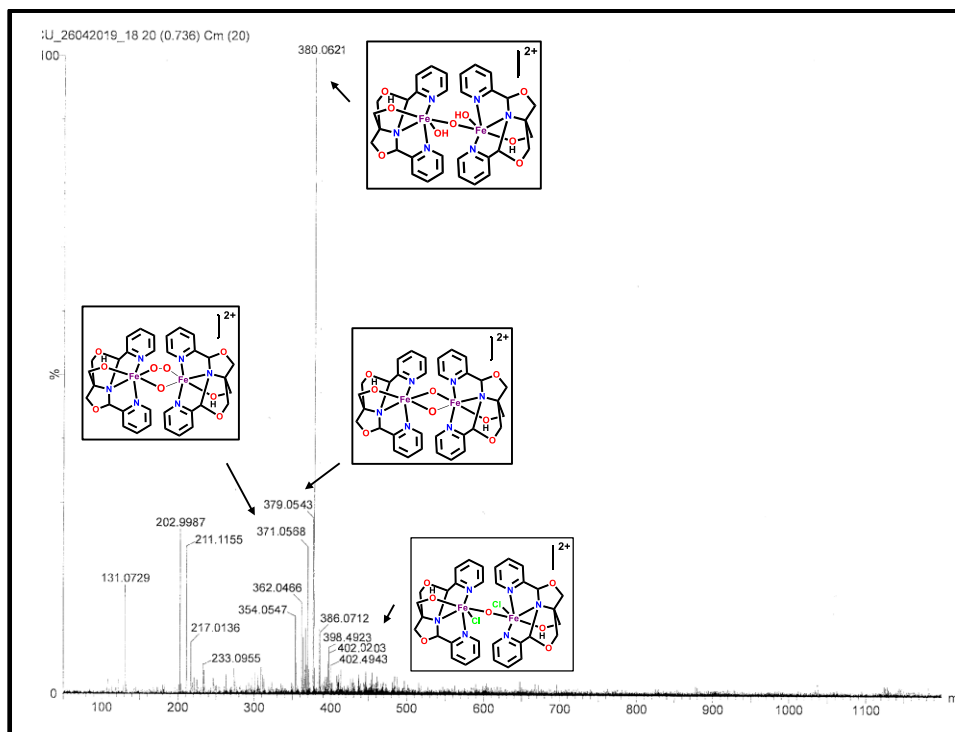

**Fig. S5** ESI-MS spectrum of the **complex 1** under basic conditions, when the Cl ligands at the metal centres of the complex were found replaced by OH. ESI-MS analysis revealed an intense peak at  $m/z = 379.0111$  amu, which corresponds to A  $[(\text{FeLOH})_2\text{O}]^{2+}$ . The corresponding intermediates have been characterized.



## X-ray Crystal Structure Determination

**Table S1.** Crystallographic Data and Details of Refinement for complexes [(FeLCl)<sub>2</sub>O](FeCl<sub>4</sub>)<sub>2</sub> **1** and [(FeLCl)<sub>2</sub>O]Cl<sub>2</sub> **2**.

|                                                                | 1                                                                                              | 2                                                                                              |
|----------------------------------------------------------------|------------------------------------------------------------------------------------------------|------------------------------------------------------------------------------------------------|
| <b>formula</b>                                                 | C <sub>36</sub> H <sub>46</sub> Cl <sub>10</sub> Fe <sub>4</sub> N <sub>6</sub> O <sub>9</sub> | C <sub>32</sub> H <sub>40</sub> Cl <sub>4</sub> Fe <sub>2</sub> N <sub>6</sub> O <sub>10</sub> |
| <b>fw</b>                                                      | 1284.69                                                                                        | 922.20                                                                                         |
| <b>crystal system</b>                                          | Monoclinic                                                                                     | Monoclinic                                                                                     |
| <b>space group</b>                                             | <i>P</i> 2 <sub>1</sub> /n                                                                     | <i>P</i> 2 <sub>1</sub> /c                                                                     |
| <b><i>a</i> (Å)</b>                                            | 13.612(3)                                                                                      | 11.8719(6)                                                                                     |
| <b><i>b</i> (Å)</b>                                            | 13.537(2)                                                                                      | 16.9617(8)                                                                                     |
| <b><i>c</i> (Å)</b>                                            | 14.409(3)                                                                                      | 9.4064(5)                                                                                      |
| <b><math>\beta</math> (deg)</b>                                | 109.931(6)                                                                                     | 102.136(2)                                                                                     |
| <b><i>V</i> (Å<sup>3</sup>)</b>                                | 2496.0(8)                                                                                      | 1851.81(16)                                                                                    |
| <b><i>Z</i></b>                                                | 2                                                                                              | 2                                                                                              |
| <b><math>\rho_{\text{calcd}}</math> (g cm<sup>-3</sup>)</b>    | 1.709                                                                                          | 1.654                                                                                          |
| <b><math>\mu</math> (mm<sup>-1</sup>)</b>                      | 1.730                                                                                          | 1.137                                                                                          |
| <b>F(000)</b>                                                  | 1300                                                                                           | 948                                                                                            |
| <b><math>\theta</math> range data collection (deg)</b>         | 2.13 - 26.73                                                                                   | 2.52 - 26.39                                                                                   |
| <b>reflections collected</b>                                   | 18516                                                                                          | 20605                                                                                          |
| <b>unique reflections</b>                                      | 5264                                                                                           | 3781                                                                                           |
| <b><i>R</i>(int)</b>                                           | 0.1046                                                                                         | 0.0804                                                                                         |
| <b>reflections <math>I &gt; 2\sigma(I)</math></b>              | 4383                                                                                           | 3083                                                                                           |
| <b>no. of parameters</b>                                       | 300                                                                                            | 259                                                                                            |
| <b>Goodness of fit <sup>b</sup></b>                            | 1.116                                                                                          | 1.040                                                                                          |
| <b><i>R</i>1<sup>a</sup></b>                                   | 0.0867                                                                                         | 0.0487                                                                                         |
| <b><i>wR</i>2<sup>a</sup> [<math>I &gt; 2\sigma(I)</math>]</b> | 0.2206                                                                                         | 0.1100                                                                                         |
| <b>residual density (eÅ<sup>-3</sup>)</b>                      | 1.740, -0.746                                                                                  | 0.838, -0.713                                                                                  |

$$^a R1 = \sum |F_o| - |F_c| / \sum |F_o|; wR2 = \{ \sum [w(F_o^2 - F_c^2)^2] / \sum [w(F_o^2)^2] \}^{1/2}$$

$$^b \text{GOF} = \{ \sum [w(F_o^2 - F_c^2)^2] / (n-p) \}^{1/2}.$$

**Table S2.** Selected bond lengths (Å) and angles (°) for complexes [(FeLCl)<sub>2</sub>O](FeCl<sub>4</sub>)<sub>2</sub> (**1**) and [(FeLCl)<sub>2</sub>O]Cl<sub>2</sub> (**2**).

|                           | 1          |                      | 2          |
|---------------------------|------------|----------------------|------------|
| <b>Fe(1)-N(1)</b>         | 2.119(6)   | <b>Fe-N(1)</b>       | 2.143(3)   |
| <b>Fe(1)-N(2)</b>         | 2.125(6)   | <b>Fe-N(2)</b>       | 2.147(3)   |
| <b>Fe(1)-N(3)</b>         | 2.180(6)   | <b>Fe-N(3)</b>       | 2.214(3)   |
| <b>Fe(1)-O(3)</b>         | 2.212(5)   | <b>Fe-O(3)</b>       | 2.158(3)   |
| <b>Fe(1)-O(4)</b>         | 1.8041(10) | <b>Fe-O(4)</b>       | 1.7825(5)  |
| <b>Fe(1)-Cl(1)</b>        | 2.276(2)   | <b>Fe-Cl(1)</b>      | 2.2802(10) |
|                           |            |                      |            |
| <b>Fe(2)-Cl(2)</b>        | 2.195(2)   |                      | -          |
| <b>Fe(2)-Cl(3)</b>        | 2.196(2)   |                      | -          |
| <b>Fe(2)-Cl(4)</b>        | 2.199(2)   |                      | -          |
| <b>Fe(2)-Cl(5)</b>        | 2.200(2)   |                      | -          |
|                           |            |                      |            |
| <b>O(4)-Fe(1)-N(1)</b>    | 90.38(16)  | <b>O(4)-Fe-N(1)</b>  | 88.61(8)   |
| <b>O(4)-Fe(1)-N(2)</b>    | 91.97(17)  | <b>O(4)-Fe-N(2)</b>  | 92.78(8)   |
| <b>N(1)-Fe(1)-N(2)</b>    | 155.1(2)   | <b>N(1)-Fe-N(2)</b>  | 152.86(11) |
| <b>O(4)-Fe(1)-N(3)</b>    | 91.03(16)  | <b>O(4)-Fe-N(3)</b>  | 95.31(8)   |
| <b>N(1)-Fe(1)-N(3)</b>    | 78.3(2)    | <b>N(1)-Fe-N(3)</b>  | 77.12(11)  |
| <b>N(2)-Fe(1)-N(3)</b>    | 76.9(2)    | <b>N(2)-Fe-N(3)</b>  | 75.77(11)  |
| <b>O(4)-Fe(1)-O(3)</b>    | 165.14(15) | <b>O(4)-Fe-O(3)</b>  | 170.07(7)  |
| <b>N(1)-Fe(1)-O(3)</b>    | 86.0(2)    | <b>N(1)-Fe-O(3)</b>  | 87.39(11)  |
| <b>N(2)-Fe(1)-O(3)</b>    | 85.4(2)    | <b>N(2)-Fe-O(3)</b>  | 86.69(11)  |
| <b>N(3)-Fe(1)-O(3)</b>    | 74.1(2)    | <b>O(3)-Fe-N(3)</b>  | 74.94(10)  |
| <b>O(4)-Fe(1)-Cl(1)</b>   | 104.88(7)  | <b>O(4)-Fe-Cl(1)</b> | 101.66(3)  |
| <b>N(1)-Fe(1)-Cl(1)</b>   | 101.70(17) | <b>N(1)-Fe-Cl(1)</b> | 104.09(8)  |
| <b>N(2)-Fe(1)-Cl(1)</b>   | 101.60(18) | <b>N(2)-Fe-Cl(1)</b> | 102.16(9)  |
| <b>N(3)-Fe(1)-Cl(1)</b>   | 164.08(17) | <b>N(3)-Fe-Cl(1)</b> | 163.00(8)  |
| <b>O(3)-Fe(1)-Cl(1)</b>   | 89.97(14)  | <b>O(3)-Fe-Cl(1)</b> | 88.13(7)   |
| <b>Fe(1)-O(4)-Fe(1)#1</b> | 180.0      | <b>Fe-O(4)-Fe#2</b>  | 180.0      |

Symmetry code: #1 -x+1, -y+2, -z+1; #2 -x+1, -y+1, -z+1.

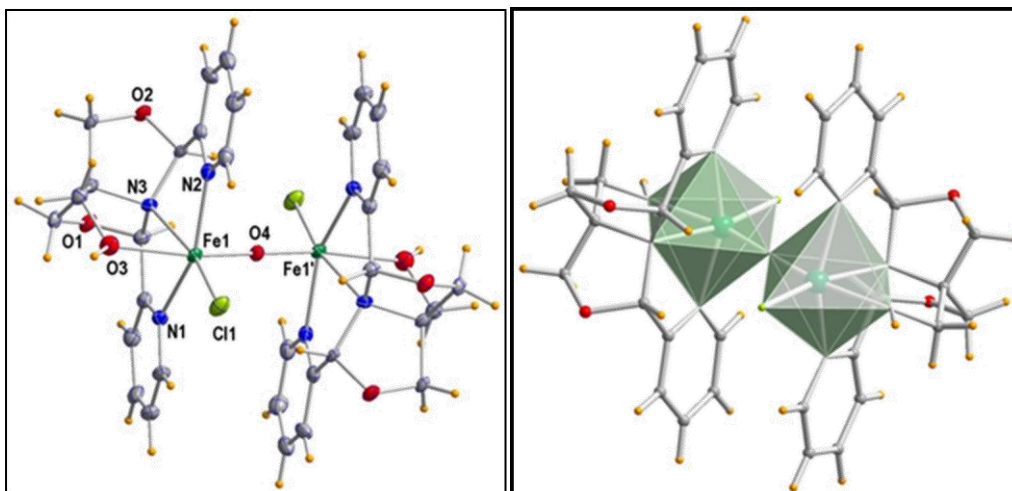

**Fig. S6** ORTEP view (ellipsoids at 50% probability) of the centrosymmetric **Complex 1** cation  $[(\text{FeLCI})_2\text{O}]^{2+}$  (C atoms not labelled for sake of clarity) and molecular structure with polyhedra around Fe ions.

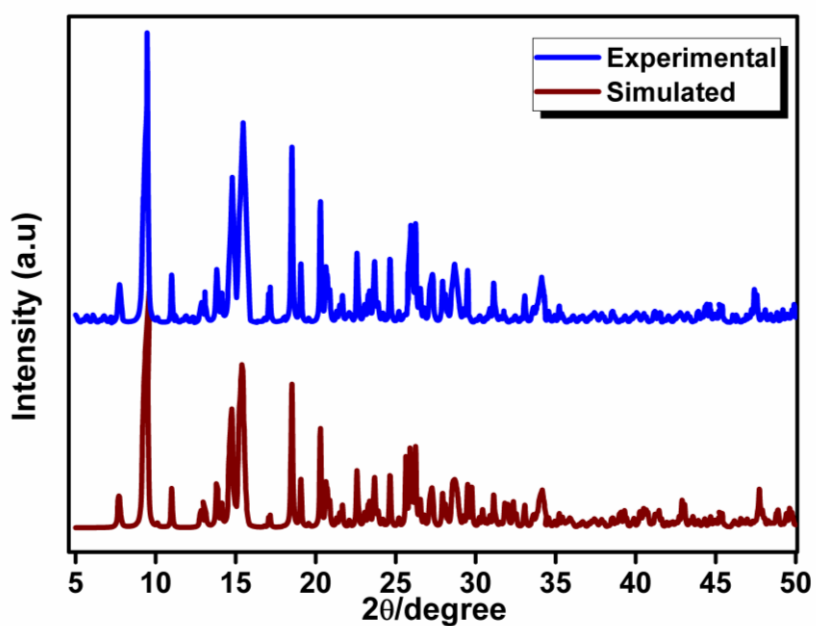

**Fig. S7** PXRD pattern of the **Complex 1** (bulk) and the simulated one. It indicates that the bulk materials are same as the simulated one which comes from the single crystal. So, the materials are pure.

## Electrochemical Measurements

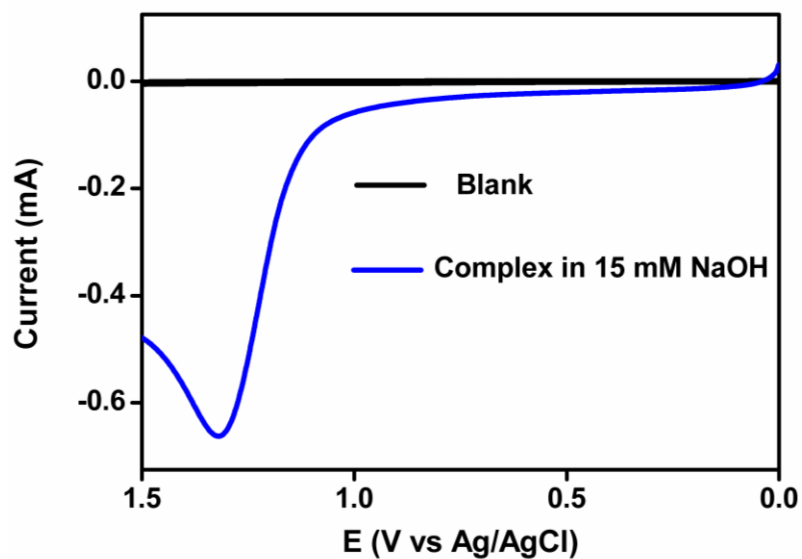

**Fig. S8** The Fig. is the overlay of LSVs of acetonitrile in presence (blue) and in absence (black) of 0.4 mM **complex 1** containing 15 mM aqueous NaOH and 100 mM tetrabutylammonium perchlorate as supporting electrolyte (GC working electrode, Pt counter electrode).

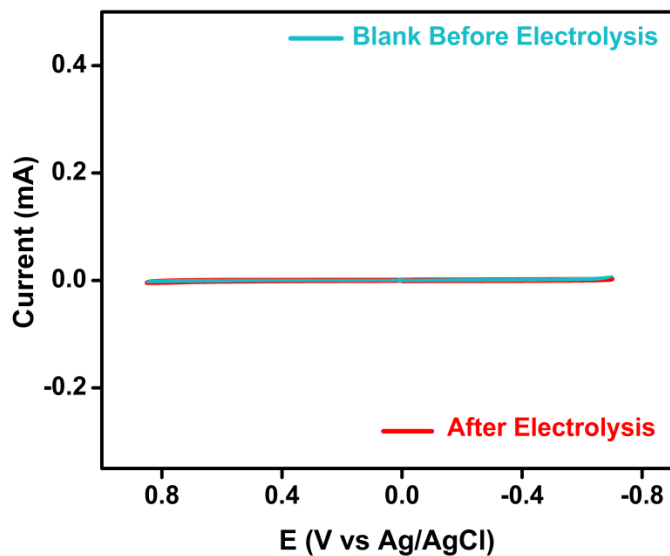

**Fig. S9** Cyclic Voltammetry (CV) of the blank (without **complex 1** cyan color) and after bulk

electrolysis just rinsing the electrode without polishing (red) (0.4 mM in ACN, scan rate: 0.1 V/s, GC working electrode, 0.1 M  $n\text{Bu}_4\text{NClO}_4$  as a supporting electrolyte). This experiment further proved that there is no deposition of any particle on the working electrode surface.

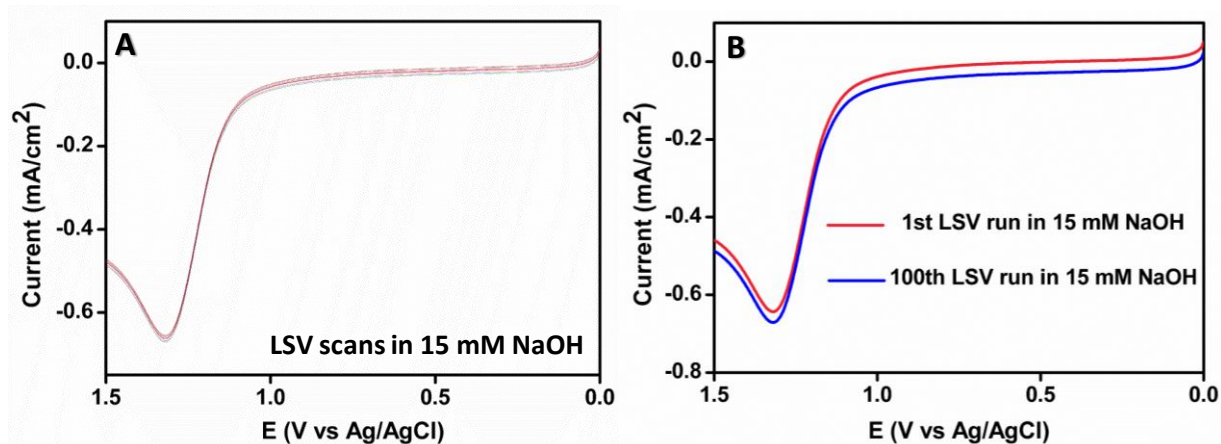

**Fig. S10(A)** Continuous 1-15, 20, 25, 30, 35 upto 100 LSV scans of the catalyst (0.4mM solution of **complex 1** in ACN with 15mM concentration of NaOH) (scan rate: 0.1 V/s, GC working electrode) and **(B)** a clear picture of 1<sup>st</sup> LSV scan with 100<sup>th</sup> LSV scan of the complex in the same electrolytic condition.

### Overpotential Calculation

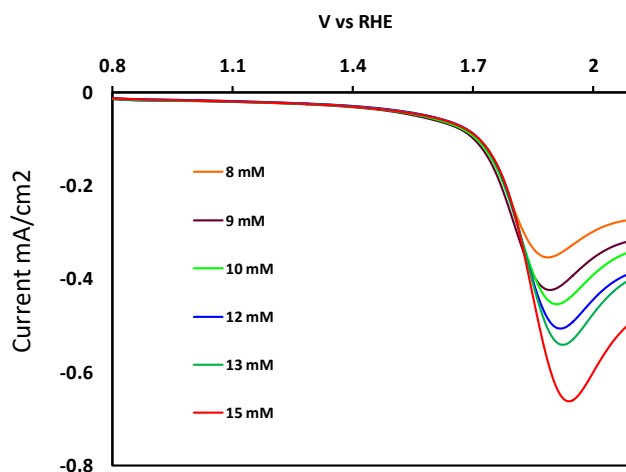

**Fig. S10 (C)** Linear Sweep Voltammetry (LSV) of 0.4 mM solution of complex with increasing concentration of NaOH.

The thermodynamic potential for H<sub>2</sub>O/O<sub>2</sub> couple at a particular pH could be determined from Nernst equation and the equation could be represented as  $E = E_{\text{RHE}} - 1.23 \text{ V}$  as the standard potential  $E^0_{\text{H}_2\text{O}/\text{O}_2} = 1.23 \text{ V}$ .

Onset potential for OER is 1.82 V vs RHE (considering mid wave potential).

So, overpotential for OER of the complex at pH 7.18 is  $(1.82 - 1.23) \text{ V} = 0.59 \text{ V}$ .

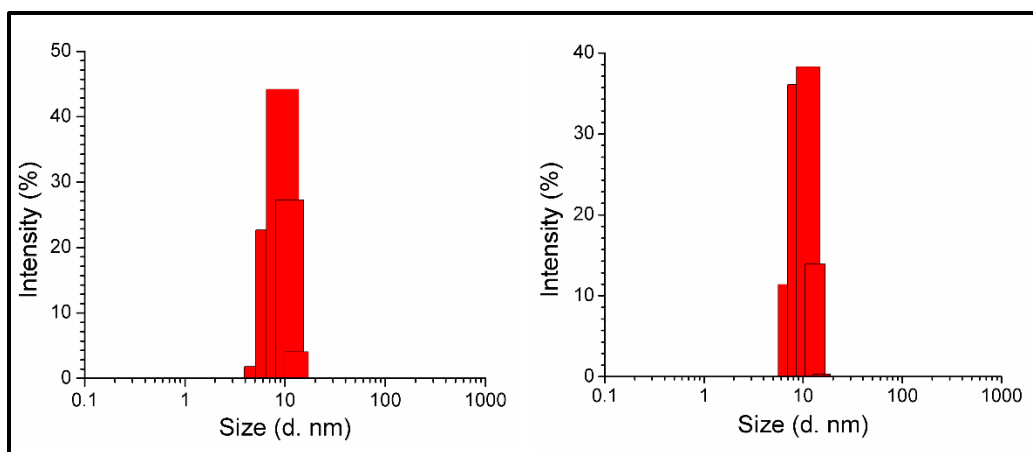

**Fig. S11** Dynamic Light Scattering (DLS) experiment of the electrolytic solution before (left) and after (right) electrolysis of the catalyst solution.

### **Bulk Electrolysis (BE) and Gas Collection**

The BE experiment was done in a four neck, two compartment, three electrode electrochemical cell brought from PINE with 1.77 cm<sup>2</sup>Hg-pool working electrode connected to an inverted burette for product analysis. The gas evolved during BE was collected into the burette by vertical displacement of water. The amount of gas evolved during the experiments was measured from the volume of water displaced. To check the stability of the catalyst BE was performed on a 1.77 cm<sup>2</sup>Hg-pool electrode in the custom made 4 neck two compartment electrochemical cell with 6 mL 0.4 mM catalyst in ACN solution containing 15 mM NaOH. Same reaction was performed by using acetonitrile medium varying the base concentration.

### **Calculation of Diffusion Constants from Cyclic Voltammograms of Complex**

According to the Randles-Sevcik equation peak current of a redox event is given by

$$i_p = 0.4463(F/RT)^{1/2}n_p^{3/2}FAD^{1/2}[C_0]v^{1/2}$$

where,  $i_p$  is the peak current,  $F$  Faraday's constant ( $F = 96500 \text{ C mol}^{-1}$ ),  $R$  the universal gas constant ( $R = 8.314 \text{ J K}^{-1} \text{ mol}^{-1}$ ),  $T$  temperature ( $T = 300 \text{ K}$ ),  $n_p$  is the number of electrons transferred ( $n_p = 1$  for  $\text{Fe}^{3+/2+}$  in **complex1**),  $A$  is the active surface area of the electrode (here aGC electrode,  $A = 0.068 \text{ cm}^2$ ),  $D$  is the diffusion coefficient for the complex,  $[C_0]$  is the concentration of the catalyst ( $[C_0] = 0.4 \text{ mM}$ ), and  $v$  is the scan rate. The diffusion coefficient  $D (= 2.21 \times 10^{-6} \text{ cm}^2\text{s}^{-1})$  was calculated from the slope of  $i_p$  vs  $v^{1/2}$  plot (Fig. S12). Therefore,  $0.4463(F/RT)^{1/2}n_p^{3/2}FAD^{1/2}[C_0] = 10.83$ .

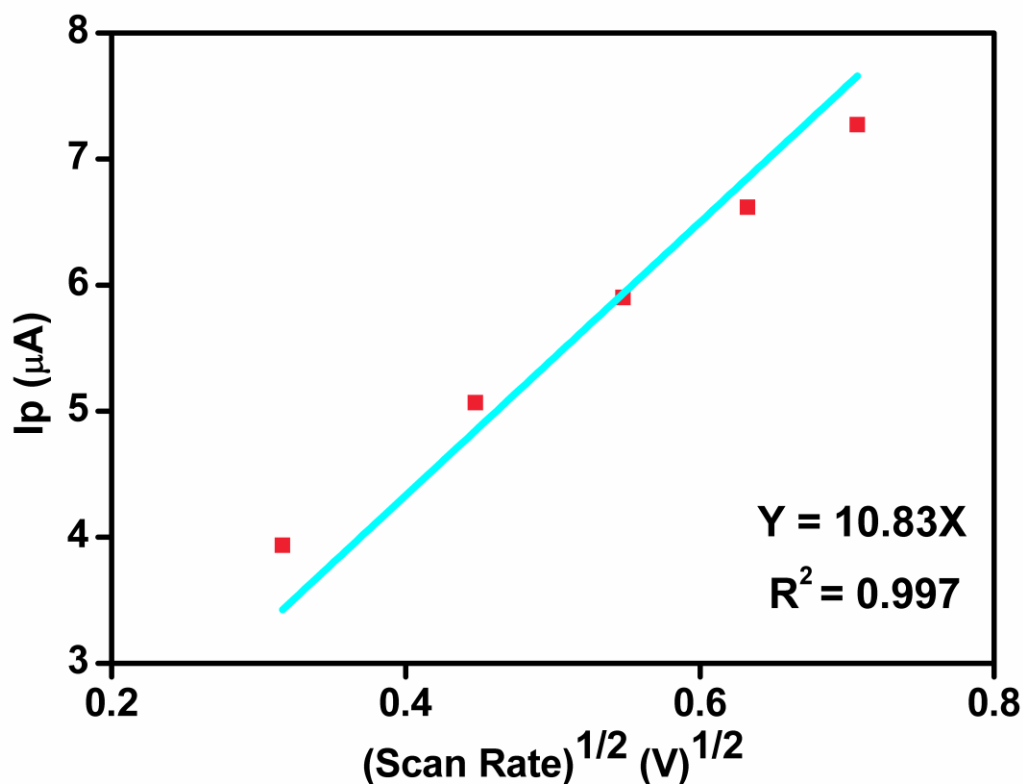

**Fig. S12** Plot of the peak current of the  $\text{Fe}^{3+/2+}$  process vs square root of the scan rates.

### Calculation of Faradic Efficiency (FE) from Total Charge Accumulated During Control Potential Electrolysis (CPE)

The Faradic efficiency (FE (%)) was calculated based on following equation:

$$FE(\%) = \frac{4 \times \text{amount of } O_2 (\text{moles}) \times 100}{n(\text{moles of electrons})}$$

$$\text{Where, } n = \frac{Q(\text{columb})}{F(\text{Faraday const.})}$$

During the Constant Potential Electrolysis (CPE) at 1.0 V vs Ag/AgCl total charge consumed was 21.8 C in 17.3 min and 0.97 mL O<sub>2</sub> gas was collected in an inverted burette set up connected to electrolyser cell through a channel. Total moles of O<sub>2</sub> produced during bulk electrolysis = (0.97/22400)mol = 43.3 x 10<sup>-6</sup>, and Faradaic Yield (FY) = 78.6%.

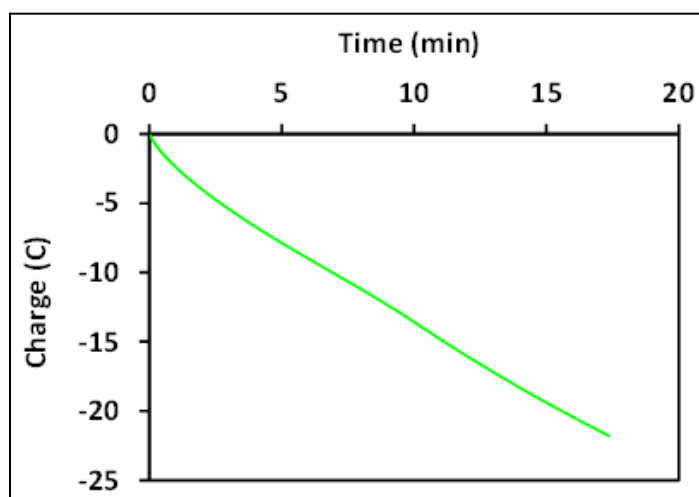

**Fig. S13** Total accumulated charge during bulk electrolysis at 1.0 V vs Ag/AgCl on a 1.77 cm<sup>2</sup> Hg-pool electrode in ACN solution containing 15 mM of NaOH (0.4mM**complex1**).

### TON Calculation

At 1.0 V vs Ag/AgCl TON = (Total no. of moles of O<sub>2</sub> produced/ total no. of moles of catalyst used).

During bulk electrolysis (BE) at 1.0 V vs Ag/AgCl potential using Hg-pool electrode amount of O<sub>2</sub> collected is 3.8 mL, *i.e.* (3.8/22400) moles.

During BE, 4 mL 0.4mM solution was used and after 1 hr of electrolysis decay of the catalyst was 26%. (Fig. S16)



$$\text{TON} = (3.8/22400) \times (10^3/0.4 \times 10^{-3} \times 4) \times (100/26) \approx 408$$

TOF after 1 hr is  $0.11 \text{ s}^{-1}$

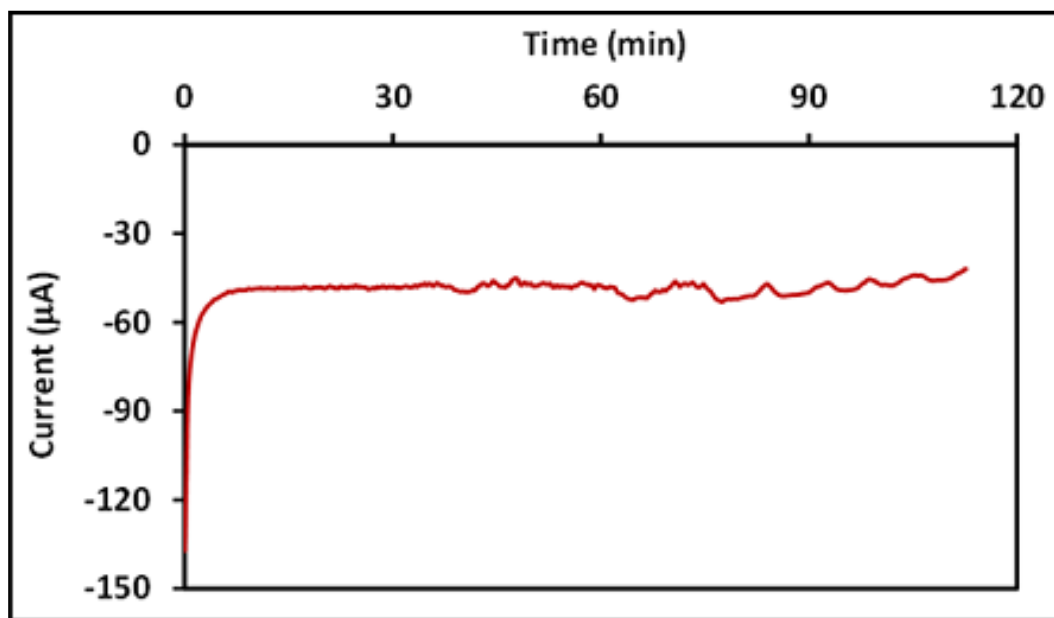

**Fig. S14** Total current generated during bulk electrolysis at 1.0 V vs Ag/AgCl on a Glassy Carbon (GC) electrode in ACN solution containing 15 mM of NaOH (0.4 mM **complex 1**).

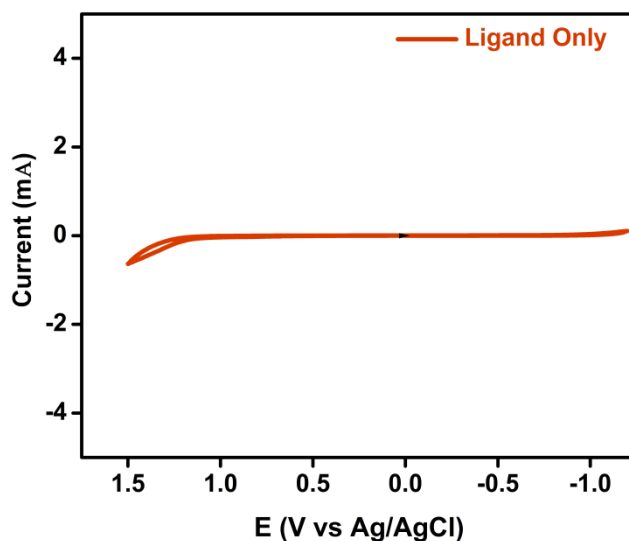

**Fig. S15** Cyclic Voltammetry (CV) of the ligand (0.4 mM in ACN, scan rate: 0.1 V/s, GC working electrode, 0.1 M nBu<sub>4</sub>NClO<sub>4</sub> as a supporting electrolyte). The result suggests that the ligand system is redox inactive, and it does not take part in electrolysis process.

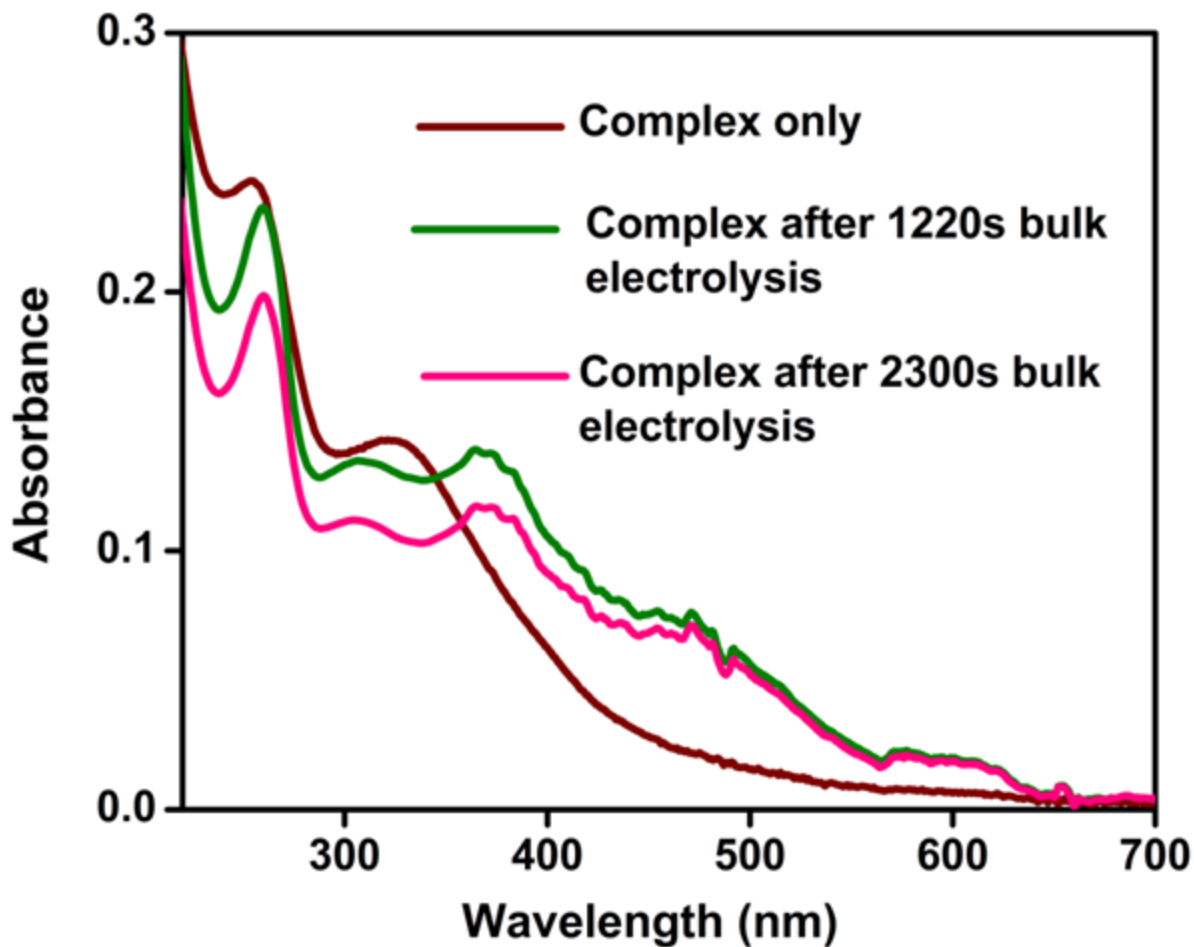

**Fig. S16** UV-visible spectra of the **complex 1** in ACN medium (brown), bulkelectrolysis of the **complex** after 1220s (green) maintaining the electrolytic condition and bulk electrolysis of the **complex** after 2300s (red).

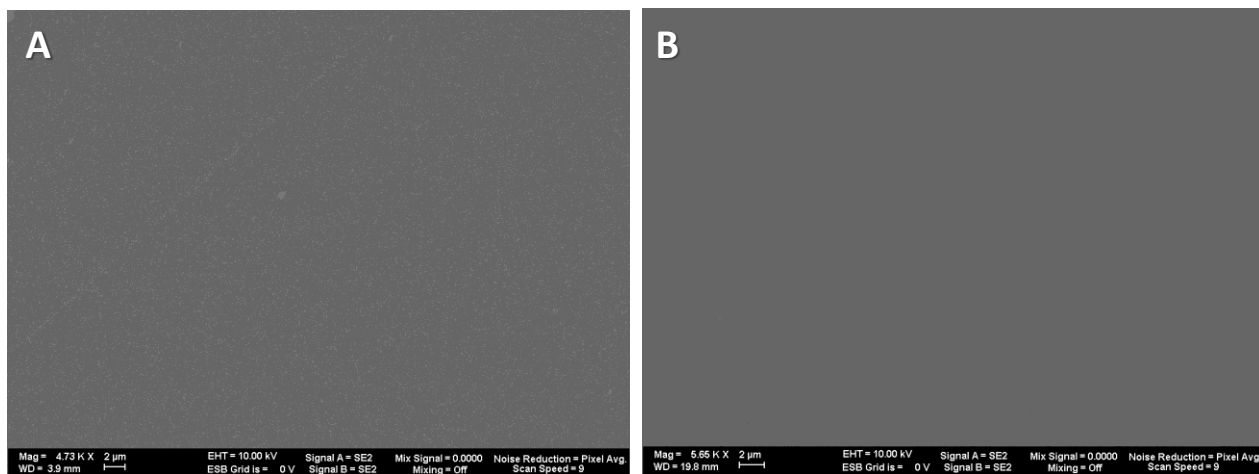

**Fig. S17** SEM images of the electrode (A) before bulk electrolysis and (B) after electrolysis.

## Synthesis procedure of complex 2

**Complex 2**  $[(\text{FeLCl})_2\text{O}]\text{Cl}_2$  was synthesized by adding an acetonitrile solution of tris(hydroxymethyl)aminomethane (2-amino-2-(hydroxymethyl) propane-1,3-diol) (0.121 g, 1.0 equiv.) drop wise to a solution of pyridine-2- carbaldehyde (0.107 g, 1.0 equiv.) under stirring condition, and the resulting mixture was refluxed in an water bath maintaining the temperature at  $100^\circ\text{C}$  for 3h. Then, a 1:1 acetonitrile–water solution of anhydrous iron(III) chloride (0.162 g, 1 mM) was added to it drop wise to avoid precipitation under reflux for further 4h. Then the solution was filtered washed several times with ether and kept in a  $\text{CaCl}_2$  desiccator. After a few days, square shaped brownish black colored crystals suitable for X-ray diffraction were obtained.

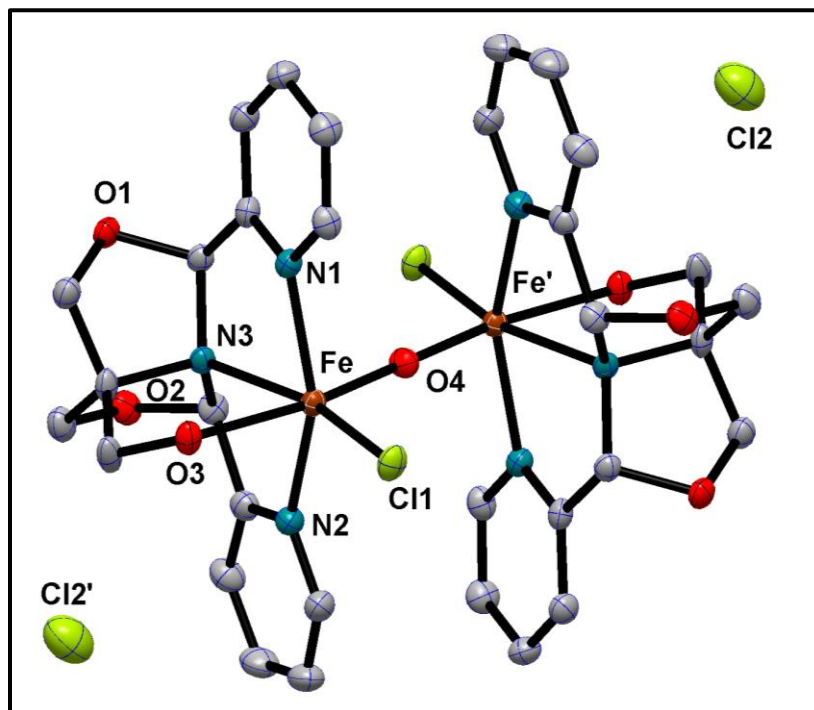

**Fig. S18** ORTEP view (ellipsoids at 50% probability) of centrosymmetric complex 2  $[(\text{FeLCl})_2\text{O}]\text{Cl}_2$  ( $\text{Fe}'$  at  $-x+1, -y+1, -z+1$ ; lattice water molecules not shown).

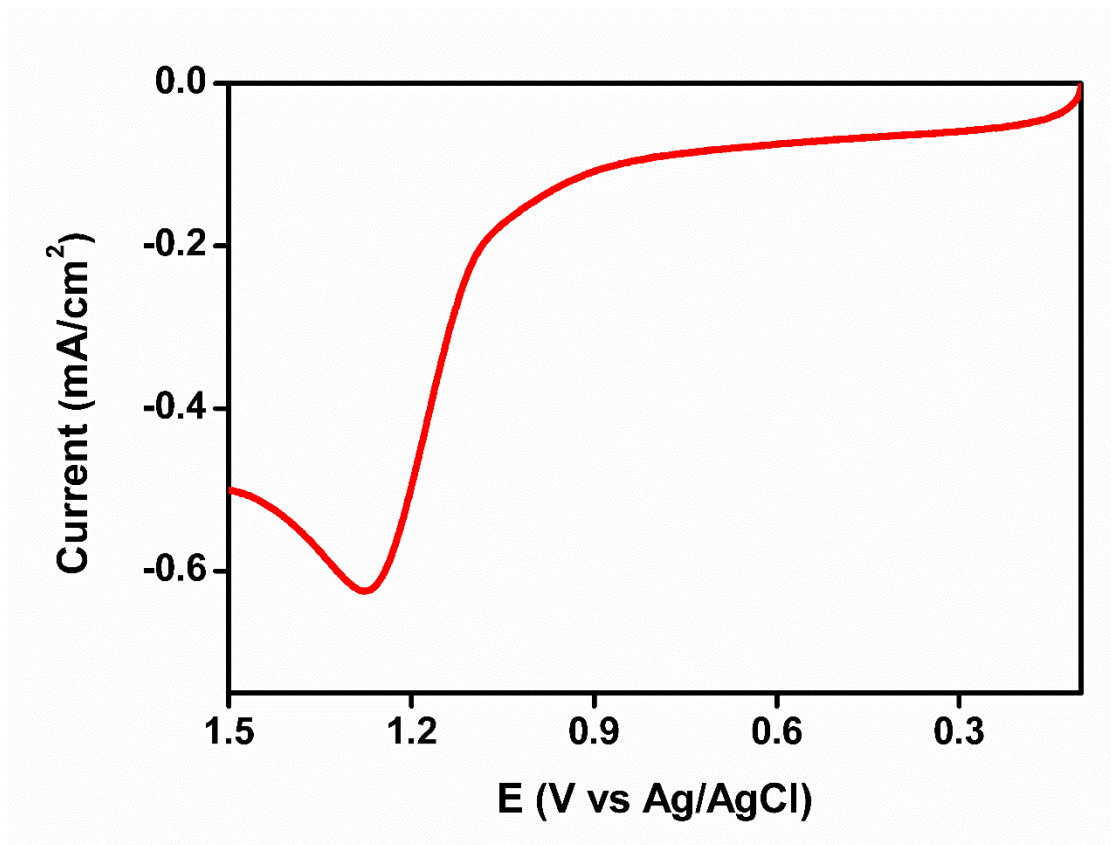

**Fig. S18 (A)** LSVs of newly synthesized **complex 2** (replacing the anionic part). We maintain the electrocatalytic condition as those applied for **complex 1** (0.4 mM complex containing 15 mM aqueous NaOH and 100 mM tetrabutylammonium perchlorate as supporting electrolyte GC working electrode, Pt counter electrode). We found the same result as for **complex 1**. Herein, we assure that the cationic part of our synthesized **complex 1** is mainly responsible for the electrocatalytic process.

### Tafel Plot and Electron Count Analysis

As Oxygen Evolving Reaction (OER) consists of large number of intermediate, so Tafel slop generally cannot be used for predicting the mechanism of OER reaction but it is important to determine the number of electrons transferred during the OER reaction. The Tafel plot of an electrocatalytic process (OER) is acquired by plotting the linear sweep voltammogram (LSV, maintaining the catalytic condition) as a plot of  $\log(j)$  versus  $\eta$ .

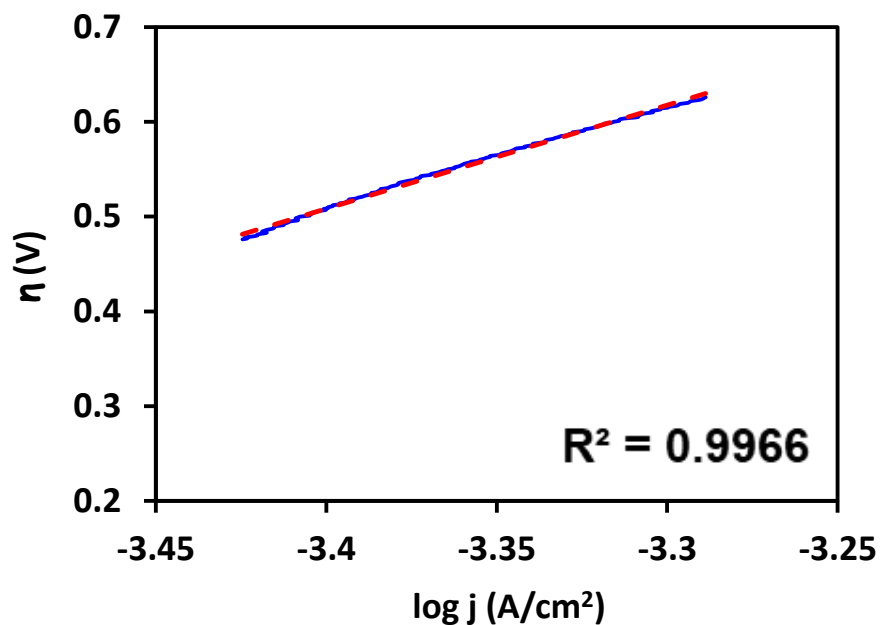

**Fig. S19** Tafel plot of the complex maintaining the catalytic condition followed by voltammetry methodology. From the graph the calculated value of the Tafel slope is 110 mV dec<sup>-1</sup>, which is in agreement with literature value for one electron transfer process.

### **XPS Spectra analysis for complex 1**

The metal electron binding energy (BE) values in the complex is important to analyze the coordination model. Dinuclear iron (III) complexes have been characterized by X-ray photoelectron spectra (XPS). C1s, N1s, O1s, Cl2s, Cl2p and Fe2p bands of the complex are approximately the same as those reported in the literature.

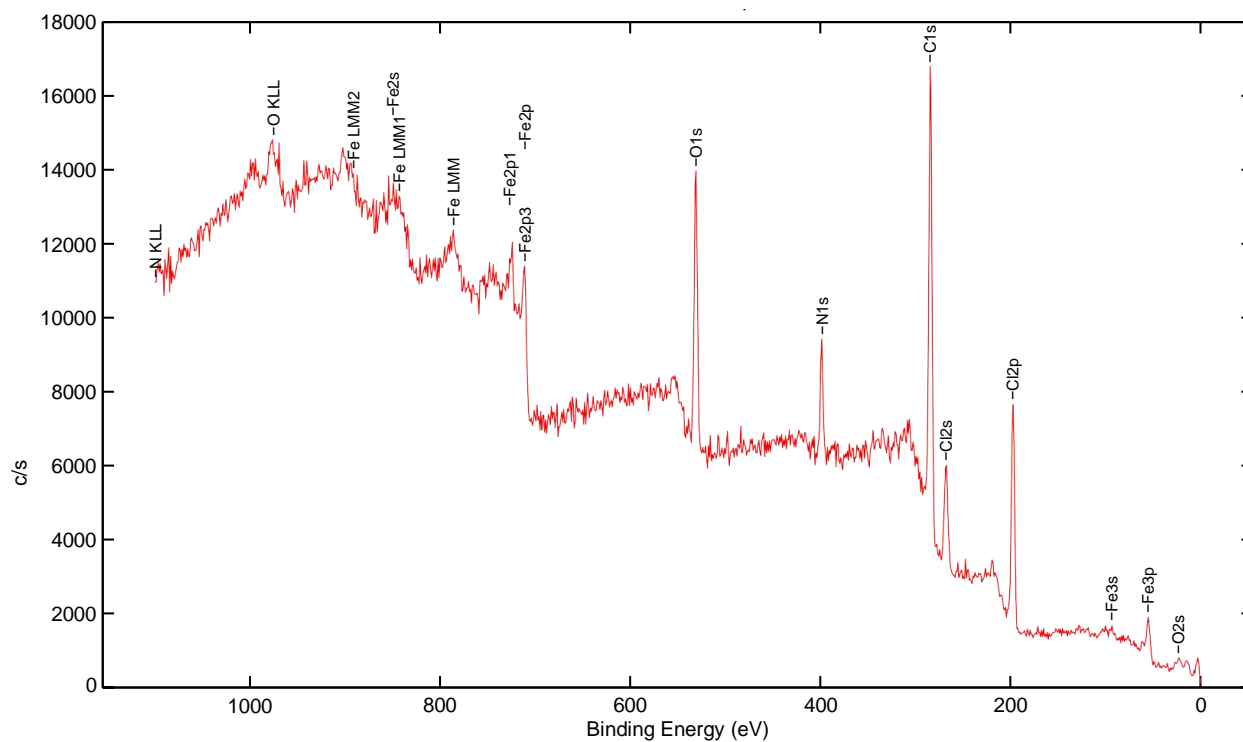

**Fig. S20** X-ray photoelectron spectra (XPS) of the catalytic complex **1**.

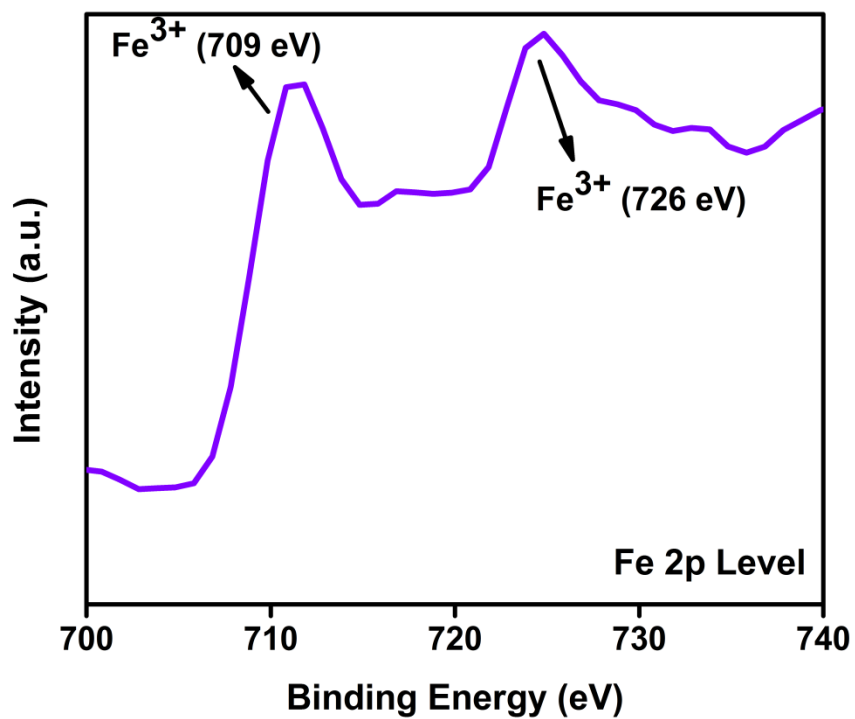

**Fig. S20A** XPS spectra of Fe2p level in the purple ruby of complex **1**.

## The electrochemical impedance study

To explore the electron transfer kinetics, electrochemical impedance spectroscopy (EIS) measurements have been performed with complex 1 maintaining the same catalytic medium. It should be noted that all EIS measurement has been performed at the over potential and the results are displayed in Fig. S21 as Nyquist plots. The semicircular region i.e. the kinetically controlled region of the impedance spectra of the complex have been fitted using the Randles equivalent circuits to calculate charge transfer resistance. The charge transfer resistance for the water splitting reaction using complex 1 as electrocatalyst has been found to be  $1690 \Omega \text{ cm}^2$  which is also consistent with the OER activity of these types of homogeneous catalysts.

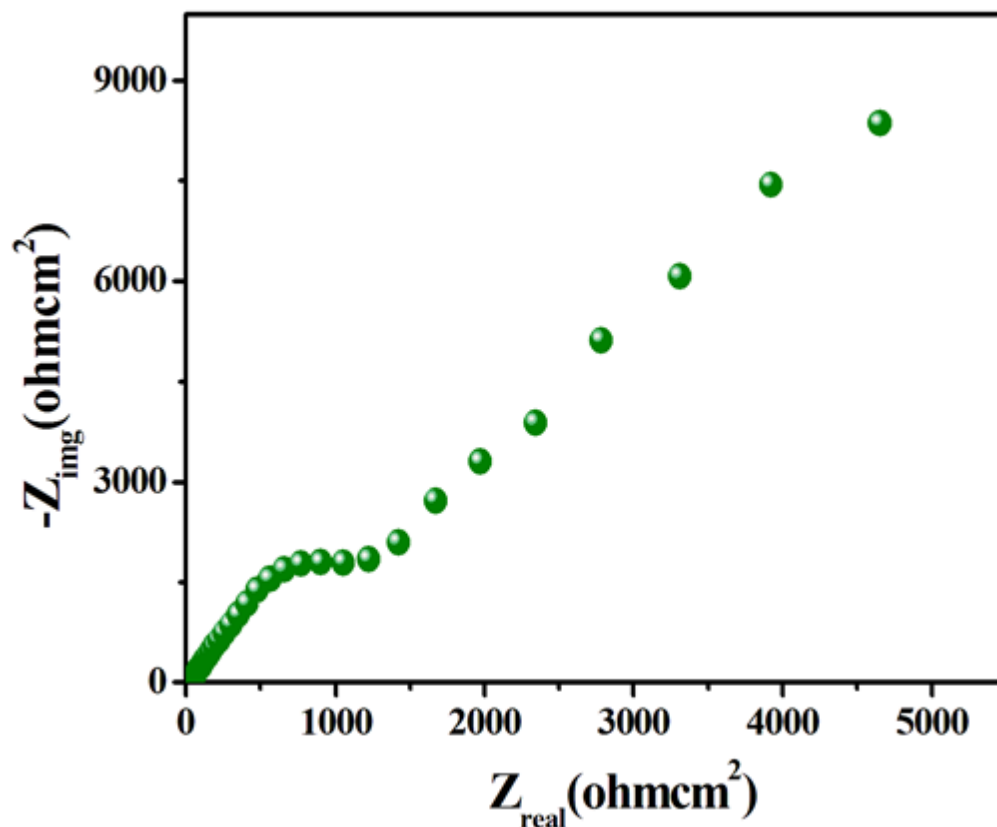

**Fig. S21** Impedance spectra of **complex 1** (green), electrical equivalent electrical circuit models used to explain the EIS response of the water oxidation reaction.

## Computational Results

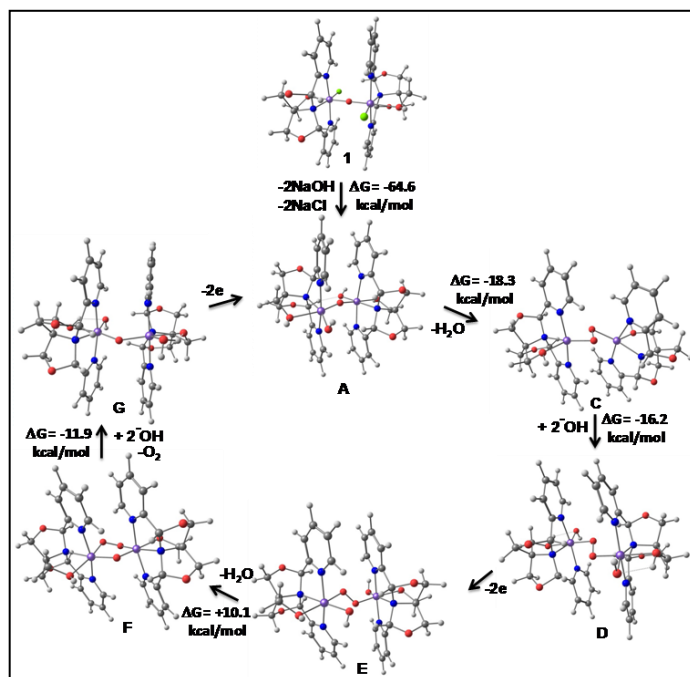

**Fig. S22M06-2X/6-31G(d)** optimized geometries for the intermediates of electrocatalytic water oxidation of **complex 1 cation**.

### Coordinates of optimized geometries

#### Complex 1

Charge 2, Multiplicity 1

|    |           |           |           |
|----|-----------|-----------|-----------|
| Fe | 0.445000  | -1.513400 | 0.724700  |
| O  | 0.000000  | 0.000000  | 0.000000  |
| Fe | -0.445000 | 1.513400  | -0.724700 |
| C  | 2.312800  | -2.033100 | -1.597300 |
| H  | 1.485800  | -2.615000 | -1.991500 |
| C  | 3.503200  | -1.870000 | -2.293400 |
| H  | 3.619900  | -2.324000 | -3.270300 |
| C  | 4.523800  | -1.121000 | -1.714800 |
| H  | 5.465700  | -0.977800 | -2.233500 |
| C  | 4.321200  | -0.554800 | -0.461200 |
| H  | 5.090800  | 0.027400  | 0.032900  |
| C  | 3.097300  | -0.752600 | 0.165300  |
| C  | 2.858400  | -0.164800 | 1.551100  |
| H  | 2.767800  | 0.924900  | 1.511100  |
| C  | 3.617000  | -1.858600 | 2.785100  |
| H  | 4.250900  | -2.131600 | 3.627400  |
| H  | 3.785900  | -2.552400 | 1.950300  |
| C  | 2.130800  | -1.783100 | 3.149400  |
| C  | 1.366000  | -3.093800 | 2.995500  |



|    |           |           |           |
|----|-----------|-----------|-----------|
| H  | 1.963400  | -3.935100 | 3.357500  |
| H  | 0.416800  | -3.065000 | 3.538300  |
| C  | 1.902300  | -1.076500 | 4.515900  |
| H  | 1.126700  | -1.588300 | 5.097200  |
| H  | 2.814500  | -1.007400 | 5.107500  |
| C  | 0.815200  | 0.164500  | 2.986100  |
| H  | 0.769800  | 1.152600  | 2.516400  |
| C  | -0.574200 | -0.440900 | 3.141000  |
| C  | -1.351400 | -0.172200 | 4.257200  |
| H  | -0.960000 | 0.466900  | 5.040800  |
| C  | -2.618100 | -0.745600 | 4.334100  |
| H  | -3.252300 | -0.557000 | 5.193700  |
| C  | -3.060900 | -1.552300 | 3.291300  |
| H  | -4.045300 | -2.005000 | 3.305900  |
| C  | -2.214300 | -1.784700 | 2.212500  |
| H  | -2.498500 | -2.416500 | 1.377600  |
| N  | 2.121900  | -1.484800 | -0.391000 |
| N  | 1.618500  | -0.764400 | 2.149000  |
| N  | -0.989600 | -1.249500 | 2.150600  |
| O  | 3.906200  | -0.518600 | 2.407900  |
| O  | 1.124000  | -3.239300 | 1.591500  |
| O  | 1.493400  | 0.251200  | 4.197600  |
| H  | 0.559900  | -4.011600 | 1.405400  |
| Cl | -0.833900 | -2.877700 | -0.657300 |
| C  | -2.312800 | 2.033100  | 1.597300  |
| H  | -1.485800 | 2.615000  | 1.991500  |
| C  | -3.503200 | 1.870000  | 2.293400  |
| H  | -3.619900 | 2.324000  | 3.270300  |
| C  | -4.523800 | 1.121000  | 1.714800  |
| H  | -5.465700 | 0.977800  | 2.233500  |
| C  | -4.321200 | 0.554800  | 0.461200  |
| H  | -5.090800 | -0.027400 | -0.032900 |
| C  | -3.097300 | 0.752600  | -0.165300 |
| C  | -2.858400 | 0.164800  | -1.551100 |
| H  | -2.767800 | -0.924900 | -1.511100 |
| C  | -3.617000 | 1.858600  | -2.785100 |
| H  | -4.250900 | 2.131600  | -3.627400 |
| H  | -3.785900 | 2.552400  | -1.950300 |
| C  | -2.130800 | 1.783100  | -3.149400 |
| C  | -1.366000 | 3.093800  | -2.995500 |
| H  | -1.963400 | 3.935100  | -3.357500 |
| H  | -0.416800 | 3.065000  | -3.538300 |
| C  | -1.902300 | 1.076500  | -4.515900 |
| H  | -1.126700 | 1.588300  | -5.097200 |
| H  | -2.814500 | 1.007400  | -5.107500 |
| C  | -0.815200 | -0.164500 | -2.986100 |

|    |           |           |           |
|----|-----------|-----------|-----------|
| H  | -0.769800 | -1.152600 | -2.516400 |
| C  | 0.574200  | 0.440900  | -3.141000 |
| C  | 1.351400  | 0.172200  | -4.257200 |
| H  | 0.960000  | -0.466900 | -5.040800 |
| C  | 2.618100  | 0.745600  | -4.334100 |
| H  | 3.252300  | 0.557000  | -5.193700 |
| C  | 3.060900  | 1.552300  | -3.291300 |
| H  | 4.045300  | 2.005000  | -3.305900 |
| C  | 2.214300  | 1.784700  | -2.212500 |
| H  | 2.498500  | 2.416500  | -1.377600 |
| N  | -2.121900 | 1.484800  | 0.391000  |
| N  | -1.618500 | 0.764400  | -2.149000 |
| N  | 0.989600  | 1.249500  | -2.150600 |
| O  | -3.906200 | 0.518600  | -2.407900 |
| O  | -1.124000 | 3.239300  | -1.591500 |
| O  | -1.493400 | -0.251200 | -4.197600 |
| H  | -0.559900 | 4.011600  | -1.405400 |
| Cl | 0.833900  | 2.877700  | 0.657300  |

### Intermediate A

Charge 2, Multiplicity 1

|    |           |           |           |
|----|-----------|-----------|-----------|
| Fe | -1.320900 | -0.209700 | -1.117600 |
| C  | -0.165000 | -2.833900 | -2.155200 |
| H  | 0.062800  | -2.249300 | -3.041200 |
| C  | 0.238800  | -4.155100 | -2.012800 |
| H  | 0.785800  | -4.643800 | -2.810300 |
| C  | -0.062700 | -4.818000 | -0.825700 |
| H  | 0.250100  | -5.845900 | -0.673700 |
| C  | -0.773500 | -4.148100 | 0.165100  |
| H  | -1.044300 | -4.635400 | 1.095500  |
| C  | -1.152500 | -2.829300 | -0.063500 |
| C  | -2.020300 | -2.103100 | 0.968000  |
| H  | -1.484000 | -1.961800 | 1.910600  |
| C  | -4.036600 | -2.554800 | 0.122500  |
| H  | -5.040400 | -2.908100 | 0.356000  |
| H  | -3.685900 | -3.020900 | -0.809000 |
| C  | -3.932800 | -1.028000 | 0.047900  |
| C  | -4.223400 | -0.424300 | -1.328300 |
| H  | -5.095900 | -0.908900 | -1.777700 |
| H  | -4.421100 | 0.648700  | -1.241500 |
| C  | -4.721300 | -0.336200 | 1.200400  |
| H  | -5.300400 | 0.516100  | 0.825700  |
| H  | -5.386700 | -1.024900 | 1.721600  |
| C  | -2.569700 | 0.317200  | 1.397600  |
| H  | -1.701300 | 0.313500  | 2.067600  |
| C  | -2.634100 | 1.623500  | 0.601100  |
| C  | -3.333900 | 2.729300  | 1.064600  |

|    |           |           |           |
|----|-----------|-----------|-----------|
| H  | -3.848000 | 2.680000  | 2.018100  |
| C  | -3.370200 | 3.870200  | 0.264300  |
| H  | -3.918400 | 4.747900  | 0.589800  |
| C  | -2.696400 | 3.872200  | -0.953300 |
| H  | -2.695100 | 4.745900  | -1.594600 |
| C  | -2.018600 | 2.721500  | -1.345000 |
| H  | -1.477800 | 2.635000  | -2.283400 |
| N  | -0.841200 | -2.190600 | -1.198200 |
| N  | -2.500300 | -0.797100 | 0.432100  |
| N  | -2.006500 | 1.623900  | -0.585500 |
| O  | -3.176300 | -2.867500 | 1.210600  |
| O  | -3.070900 | -0.637700 | -2.154600 |
| O  | -3.737900 | 0.102600  | 2.136000  |
| H  | -3.186200 | -0.167100 | -2.996700 |
| O  | 0.114600  | -0.166400 | 0.205100  |
| Fe | 1.264900  | 0.489700  | 1.147900  |
| C  | 0.129900  | 3.208500  | 1.391100  |
| H  | -0.239900 | 2.825500  | 2.336100  |
| C  | -0.057100 | 4.520200  | 0.978600  |
| H  | -0.614300 | 5.206200  | 1.605500  |
| C  | 0.483100  | 4.924900  | -0.240500 |
| H  | 0.358100  | 5.946000  | -0.584500 |
| C  | 1.183300  | 4.007200  | -1.015200 |
| H  | 1.628900  | 4.280100  | -1.965000 |
| C  | 1.320200  | 2.707600  | -0.542100 |
| C  | 2.073900  | 1.660600  | -1.348000 |
| H  | 1.424500  | 1.253100  | -2.138800 |
| C  | 4.167600  | 2.195400  | -0.781200 |
| H  | 5.174600  | 2.358900  | -1.163300 |
| H  | 3.913600  | 2.978100  | -0.052900 |
| C  | 3.973700  | 0.798700  | -0.172600 |
| C  | 4.237300  | 0.723300  | 1.327200  |
| H  | 5.122100  | 1.305300  | 1.600100  |
| H  | 4.369200  | -0.312100 | 1.654700  |
| C  | 4.664000  | -0.316200 | -1.007100 |
| H  | 5.113700  | -1.073100 | -0.353200 |
| H  | 5.421500  | 0.076200  | -1.684800 |
| C  | 2.463100  | -0.800300 | -1.045500 |
| H  | 1.585800  | -0.858800 | -1.701400 |
| C  | 2.435200  | -1.835200 | 0.078900  |
| C  | 2.893200  | -3.125900 | -0.137600 |
| H  | 3.269200  | -3.402000 | -1.116700 |
| C  | 2.863800  | -4.031600 | 0.920400  |
| H  | 3.210200  | -5.049500 | 0.777900  |
| C  | 2.391800  | -3.612900 | 2.159000  |
| H  | 2.355100  | -4.282800 | 3.009200  |

|   |           |           |           |
|---|-----------|-----------|-----------|
| C | 1.966900  | -2.296700 | 2.299900  |
| H | 1.609600  | -1.927500 | 3.255300  |
| N | 0.807500  | 2.336000  | 0.637400  |
| N | 2.507700  | 0.550700  | -0.428500 |
| N | 1.991600  | -1.430800 | 1.284100  |
| O | 3.256600  | 2.194900  | -1.870800 |
| O | 3.071000  | 1.286800  | 1.930700  |
| O | 3.630900  | -0.892700 | -1.801300 |
| H | 3.093600  | 1.208600  | 2.900100  |
| O | 0.608200  | 0.730700  | 2.788600  |
| H | 0.622000  | -0.097100 | 3.294600  |
| O | -0.232300 | 0.374900  | -2.624800 |
| H | -0.506700 | -0.068400 | -3.439700 |

### Intermediate B

|    | Charge 1, Multiplicity 2 |           |           |
|----|--------------------------|-----------|-----------|
| O  | -0.153400                | -2.908400 | 0.164500  |
| Fe | -0.089900                | -1.301600 | 0.015700  |
| C  | -3.013800                | -1.841600 | -0.056700 |
| H  | -2.652000                | -2.825100 | 0.222400  |
| C  | -4.358600                | -1.542700 | -0.216500 |
| H  | -5.104600                | -2.312100 | -0.059300 |
| C  | -4.718300                | -0.246100 | -0.576300 |
| H  | -5.762000                | 0.019600  | -0.705000 |
| C  | -3.724400                | 0.706800  | -0.772000 |
| H  | -3.960100                | 1.728200  | -1.048600 |
| C  | -2.398000                | 0.329200  | -0.603000 |
| C  | -1.280700                | 1.343600  | -0.834000 |
| H  | -1.192000                | 1.574900  | -1.898700 |
| C  | -1.095800                | 2.286000  | 1.180400  |
| H  | -1.027100                | 3.235400  | 1.710500  |
| H  | -1.776600                | 1.607700  | 1.712800  |
| C  | 0.264700                 | 1.621100  | 0.954200  |
| C  | 0.702600                 | 0.718400  | 2.102000  |
| H  | 0.591200                 | 1.248500  | 3.053700  |
| H  | 1.749700                 | 0.418000  | 1.984900  |
| C  | 1.361500                 | 2.632000  | 0.516200  |
| H  | 2.304300                 | 2.438300  | 1.041900  |
| H  | 1.063500                 | 3.668400  | 0.676000  |
| C  | 1.191500                 | 1.111900  | -1.140000 |
| H  | 0.948700                 | 1.002800  | -2.200600 |
| C  | 2.311600                 | 0.150200  | -0.752100 |
| C  | 3.646500                 | 0.490000  | -0.912900 |
| H  | 3.908000                 | 1.470900  | -1.293700 |
| C  | 4.614300                 | -0.449600 | -0.566500 |
| H  | 5.667400                 | -0.213200 | -0.675000 |
| C  | 4.216900                 | -1.692200 | -0.081900 |

|   |           |           |           |
|---|-----------|-----------|-----------|
| H | 4.941700  | -2.448600 | 0.194000  |
| C | 2.859300  | -1.953500 | 0.055200  |
| H | 2.474200  | -2.896300 | 0.428700  |
| N | -2.061400 | -0.917000 | -0.242500 |
| N | 0.013100  | 0.819400  | -0.300700 |
| N | 1.934200  | -1.042500 | -0.265500 |
| O | -1.546300 | 2.533300  | -0.143800 |
| O | -0.149700 | -0.422900 | 2.060300  |
| O | 1.525200  | 2.442800  | -0.886800 |
| H | 0.079900  | -1.036200 | 2.777300  |

**Intermediate C**

| Charge 2, Multiplicity 1 |           |           |           |
|--------------------------|-----------|-----------|-----------|
| Fe                       | -1.702000 | 0.320200  | 0.431600  |
| C                        | -1.515000 | 3.304900  | 0.312300  |
| H                        | -0.632600 | 3.118900  | 0.917700  |
| C                        | -1.874400 | 4.567000  | -0.141000 |
| H                        | -1.276400 | 5.430400  | 0.126700  |
| C                        | -3.008000 | 4.689600  | -0.942500 |
| H                        | -3.318500 | 5.661000  | -1.312000 |
| C                        | -3.736100 | 3.551100  | -1.272600 |
| H                        | -4.620600 | 3.602700  | -1.897900 |
| C                        | -3.304700 | 2.322700  | -0.781200 |
| C                        | -4.070300 | 1.044300  | -1.129700 |
| H                        | -4.003000 | 0.828000  | -2.198700 |
| C                        | -5.463500 | 0.927500  | 0.606500  |
| H                        | -6.499500 | 0.776800  | 0.908600  |
| H                        | -5.024400 | 1.756700  | 1.178700  |
| C                        | -4.609000 | -0.336200 | 0.728000  |
| C                        | -3.965700 | -0.528500 | 2.099100  |
| H                        | -4.683500 | -0.292400 | 2.890900  |
| H                        | -3.619200 | -1.558800 | 2.229700  |
| C                        | -5.354200 | -1.598900 | 0.208400  |
| H                        | -5.232600 | -2.440600 | 0.900600  |
| H                        | -6.416000 | -1.416700 | 0.041900  |
| C                        | -3.463200 | -1.408600 | -1.007300 |
| H                        | -3.086500 | -1.290300 | -2.026800 |
| C                        | -2.548900 | -2.313100 | -0.170900 |
| C                        | -2.736900 | -3.688400 | -0.123200 |
| H                        | -3.524900 | -4.145300 | -0.711400 |
| C                        | -1.915000 | -4.439700 | 0.714300  |
| H                        | -2.041900 | -5.515000 | 0.780600  |
| C                        | -0.938900 | -3.797300 | 1.471600  |
| H                        | -0.287700 | -4.349800 | 2.138700  |
| C                        | -0.807900 | -2.418600 | 1.354900  |
| H                        | -0.062100 | -1.854500 | 1.907500  |
| N                        | -2.229000 | 2.217900  | 0.005000  |

|    |           |           |           |
|----|-----------|-----------|-----------|
| N  | -3.552600 | -0.103500 | -0.323900 |
| N  | -1.597100 | -1.699600 | 0.550100  |
| O  | -5.425000 | 1.189100  | -0.788900 |
| O  | -2.857300 | 0.373300  | 2.158300  |
| O  | -4.768400 | -1.906200 | -1.055500 |
| H  | -2.392200 | 0.271700  | 3.004600  |
| Fe | 1.717100  | 0.193000  | -0.490100 |
| C  | 0.603400  | -2.436100 | -1.407800 |
| H  | -0.098800 | -1.798900 | -1.937300 |
| C  | 0.603500  | -3.818300 | -1.536000 |
| H  | -0.111100 | -4.302400 | -2.191300 |
| C  | 1.531800  | -4.553500 | -0.801200 |
| H  | 1.553200  | -5.636100 | -0.868400 |
| C  | 2.445100  | -3.885100 | 0.007300  |
| H  | 3.206800  | -4.417700 | 0.565300  |
| C  | 2.392300  | -2.495700 | 0.061300  |
| C  | 3.456200  | -1.715300 | 0.842600  |
| H  | 3.280200  | -1.760200 | 1.920100  |
| C  | 5.050400  | -1.722600 | -0.710700 |
| H  | 6.112700  | -1.880200 | -0.893600 |
| H  | 4.462100  | -2.206900 | -1.502500 |
| C  | 4.671900  | -0.241900 | -0.574800 |
| C  | 4.267100  | 0.422000  | -1.889000 |
| H  | 4.935300  | 0.105700  | -2.696200 |
| H  | 4.302800  | 1.511700  | -1.802400 |
| C  | 5.733600  | 0.564900  | 0.226700  |
| H  | 5.893600  | 1.553800  | -0.220000 |
| H  | 6.687800  | 0.043900  | 0.304100  |
| C  | 3.814900  | 0.727000  | 1.382600  |
| H  | 3.342300  | 0.489600  | 2.339400  |
| C  | 3.334400  | 2.086900  | 0.865900  |
| C  | 3.860600  | 3.271000  | 1.366700  |
| H  | 4.647700  | 3.238300  | 2.112100  |
| C  | 3.353400  | 4.475000  | 0.884800  |
| H  | 3.741500  | 5.417500  | 1.255700  |
| C  | 2.342200  | 4.455700  | -0.072300 |
| H  | 1.918300  | 5.372900  | -0.464000 |
| C  | 1.880000  | 3.226400  | -0.528500 |
| H  | 1.085800  | 3.134600  | -1.262800 |
| N  | 1.473600  | -1.798200 | -0.617100 |
| N  | 3.496200  | -0.298500 | 0.370200  |
| N  | 2.378200  | 2.074000  | -0.072900 |
| O  | 4.721900  | -2.254200 | 0.565800  |
| O  | 2.929100  | -0.002100 | -2.169500 |
| O  | 5.203300  | 0.694000  | 1.541800  |
| H  | 2.610700  | 0.433600  | -2.976800 |

**Intermediate D**

O 0.188400 0.740400 0.671600  
O -0.142000 0.740800 -0.759400

Charge 0, Multiplicity 1

Fe -1.831600 -0.534200 -1.238700  
C -0.130400 -2.946900 -2.020600  
H -0.214800 -2.545000 -3.026400  
C 0.665200 -4.049200 -1.743900  
H 1.218700 -4.535500 -2.539000  
C 0.732100 -4.499900 -0.426000  
H 1.346300 -5.356200 -0.165800  
C 0.002400 -3.837400 0.550800  
H 0.019800 -4.162200 1.586100  
C -0.771200 -2.735000 0.186700  
C -1.645600 -2.063900 1.243500  
H -1.027900 -1.682600 2.054400  
C -3.658200 -3.001000 0.879900  
H -4.510800 -3.483300 1.359900  
H -3.412900 -3.525800 -0.055000  
C -3.877700 -1.510500 0.609400  
C -4.556300 -1.245400 -0.744300  
H -5.451800 -1.874300 -0.824300  
H -4.865000 -0.199400 -0.822800  
C -4.552500 -0.767400 1.798800  
H -5.355900 -0.109100 1.441500  
H -4.956400 -1.452200 2.546600  
C -2.568900 0.252100 1.410600  
H -1.588900 0.481500 1.836000  
C -3.033300 1.379700 0.489800  
C -3.652700 2.515900 0.997300  
H -3.827600 2.600900 2.064500  
C -4.034700 3.518200 0.109500  
H -4.514900 4.419900 0.476300  
C -3.790600 3.350800 -1.250600  
H -4.069600 4.111200 -1.971200  
C -3.181800 2.174500 -1.678000  
H -2.968100 1.954200 -2.719900  
N -0.836400 -2.310200 -1.080800  
N -2.473900 -0.988500 0.642400  
N -2.821300 1.214900 -0.823700  
O -2.560400 -3.008700 1.774900  
O -3.626200 -1.580800 -1.764500  
O -3.522000 -0.003200 2.420000  
H -3.580400 -0.960300 -2.514400  
Fe 1.808600 0.626400 1.245600  
C 0.134900 3.105400 1.819100

|   |           |           |           |
|---|-----------|-----------|-----------|
| H | 0.173100  | 2.760200  | 2.848500  |
| C | -0.668700 | 4.172400  | 1.441200  |
| H | -1.279300 | 4.682400  | 2.177500  |
| C | -0.667300 | 4.558200  | 0.101900  |
| H | -1.280900 | 5.388600  | -0.232900 |
| C | 0.129100  | 3.863600  | -0.798800 |
| H | 0.160700  | 4.132800  | -1.849500 |
| C | 0.879400  | 2.781400  | -0.341200 |
| C | 1.747200  | 2.008500  | -1.331600 |
| H | 1.127100  | 1.604500  | -2.129700 |
| C | 3.802200  | 2.855300  | -0.992800 |
| H | 4.687700  | 3.257900  | -1.486900 |
| H | 3.574200  | 3.450700  | -0.096700 |
| C | 3.933100  | 1.375800  | -0.624600 |
| C | 4.578700  | 1.169900  | 0.756100  |
| H | 5.497800  | 1.765900  | 0.812300  |
| H | 4.843400  | 0.120200  | 0.909400  |
| C | 4.574900  | 0.517200  | -1.753600 |
| H | 5.334800  | -0.160900 | -1.343000 |
| H | 5.024100  | 1.125700  | -2.540500 |
| C | 2.533600  | -0.362300 | -1.322100 |
| H | 1.544000  | -0.567300 | -1.739100 |
| C | 2.940800  | -1.442200 | -0.320300 |
| C | 3.557300  | -2.617100 | -0.734400 |
| H | 3.749400  | -2.779400 | -1.789500 |
| C | 3.917600  | -3.555400 | 0.229400  |
| H | 4.397900  | -4.483600 | -0.064200 |
| C | 3.654100  | -3.289400 | 1.569600  |
| H | 3.916000  | -3.997400 | 2.347500  |
| C | 3.054400  | -2.078200 | 1.902200  |
| H | 2.835400  | -1.778300 | 2.923100  |
| N | 0.890800  | 2.427800  | 0.950900  |
| N | 2.503200  | 0.932900  | -0.644700 |
| N | 2.718200  | -1.179700 | 0.975100  |
| O | 2.718600  | 2.867600  | -1.904100 |
| O | 3.648000  | 1.611100  | 1.736200  |
| O | 3.507400  | -0.228500 | -2.336700 |
| H | 3.567200  | 1.044700  | 2.522100  |
| O | 0.167700  | -0.231200 | 0.644300  |
| O | -0.200300 | 0.336000  | -0.644700 |
| O | -1.988600 | -0.135300 | -3.207400 |
| H | -1.611200 | -0.846900 | -3.742200 |
| O | 1.904900  | 0.349900  | 3.237700  |
| H | 1.560000  | 1.120000  | 3.709900  |

**Intermediate E**

Charge 2, Multiplicity 1



|    |           |           |           |
|----|-----------|-----------|-----------|
| Fe | 2.134500  | -0.176900 | 1.236300  |
| O  | -0.463000 | -0.183200 | 0.605900  |
| O  | 0.616600  | 0.440500  | 0.524900  |
| O  | 1.970500  | 0.307500  | 3.016600  |
| H  | 1.844000  | -0.459700 | 3.591900  |
| C  | 0.731700  | -2.667600 | 2.235000  |
| H  | 0.691000  | -2.142800 | 3.182800  |
| C  | 0.138400  | -3.911100 | 2.073700  |
| H  | -0.367100 | -4.379900 | 2.909100  |
| C  | 0.209900  | -4.527800 | 0.827500  |
| H  | -0.242200 | -5.500900 | 0.667500  |
| C  | 0.862100  | -3.876300 | -0.212800 |
| H  | 0.940000  | -4.316600 | -1.201100 |
| C  | 1.416500  | -2.623400 | 0.023200  |
| C  | 2.087000  | -1.876300 | -1.128000 |
| H  | 1.333300  | -1.562600 | -1.859800 |
| C  | 4.196800  | -2.567800 | -0.890100 |
| H  | 5.068500  | -2.956900 | -1.415600 |
| H  | 4.052300  | -3.119900 | 0.049400  |
| C  | 4.273100  | -1.058600 | -0.631200 |
| C  | 4.937400  | -0.678400 | 0.689600  |
| H  | 5.835800  | -1.278700 | 0.859900  |
| H  | 5.206400  | 0.381400  | 0.702700  |
| C  | 4.822700  | -0.268900 | -1.853300 |
| H  | 5.520100  | 0.514200  | -1.531800 |
| H  | 5.314300  | -0.915300 | -2.580700 |
| C  | 2.739700  | 0.519800  | -1.480100 |
| H  | 1.729800  | 0.580200  | -1.907900 |
| C  | 3.062100  | 1.746100  | -0.627400 |
| C  | 3.511400  | 2.930800  | -1.193800 |
| H  | 3.677900  | 2.985200  | -2.264000 |
| C  | 3.740300  | 4.020000  | -0.355500 |
| H  | 4.091700  | 4.960000  | -0.767700 |
| C  | 3.511900  | 3.893000  | 1.012200  |
| H  | 3.673400  | 4.722300  | 1.690200  |
| C  | 3.075000  | 2.669800  | 1.506800  |
| H  | 2.878900  | 2.483700  | 2.558000  |
| N  | 1.363600  | -2.044300 | 1.233300  |
| N  | 2.813500  | -0.676400 | -0.608800 |
| N  | 2.867300  | 1.627200  | 0.697300  |
| O  | 3.060600  | -2.684900 | -1.733700 |
| O  | 3.970100  | -0.949500 | 1.710200  |
| O  | 3.683800  | 0.306700  | -2.486300 |
| H  | 4.224700  | -0.538500 | 2.556200  |
| Fe | -1.689100 | 0.286300  | -0.839000 |
| C  | -0.308300 | 2.947900  | -1.045900 |

|   |           |           |           |
|---|-----------|-----------|-----------|
| H | 0.231700  | 2.447100  | -1.843300 |
| C | -0.002100 | 4.233200  | -0.621600 |
| H | 0.802300  | 4.782900  | -1.096300 |
| C | -0.750300 | 4.788300  | 0.414900  |
| H | -0.539200 | 5.791400  | 0.769700  |
| C | -1.771600 | 4.041900  | 0.993100  |
| H | -2.378100 | 4.438200  | 1.800100  |
| C | -2.006400 | 2.755600  | 0.518000  |
| C | -3.112800 | 1.902900  | 1.143000  |
| H | -2.891300 | 1.697200  | 2.193300  |
| C | -4.817000 | 2.312100  | -0.240200 |
| H | -5.871900 | 2.579500  | -0.293200 |
| H | -4.249700 | 2.881300  | -0.990000 |
| C | -4.566000 | 0.809300  | -0.393300 |
| C | -4.397700 | 0.352800  | -1.840400 |
| H | -5.161000 | 0.817000  | -2.472400 |
| H | -4.484700 | -0.734600 | -1.920500 |
| C | -5.586100 | -0.053900 | 0.404000  |
| H | -5.942900 | -0.897300 | -0.199300 |
| H | -6.438900 | 0.526600  | 0.756400  |
| C | -3.536300 | -0.580800 | 1.190700  |
| H | -2.926700 | -0.572500 | 2.098400  |
| C | -3.212600 | -1.811700 | 0.337500  |
| C | -3.791300 | -3.045500 | 0.598600  |
| H | -4.501200 | -3.148000 | 1.411700  |
| C | -3.443200 | -4.123000 | -0.214500 |
| H | -3.879500 | -5.100600 | -0.039300 |
| C | -2.536300 | -3.932500 | -1.252600 |
| H | -2.242100 | -4.750000 | -1.900400 |
| C | -2.004500 | -2.662600 | -1.450500 |
| H | -1.288200 | -2.428700 | -2.233100 |
| N | -1.291600 | 2.233700  | -0.486600 |
| N | -3.286000 | 0.628300  | 0.381100  |
| N | -2.345300 | -1.632400 | -0.672600 |
| O | -4.342300 | 2.575800  | 1.072300  |
| O | -3.094600 | 0.770500  | -2.265000 |
| O | -4.884100 | -0.526800 | 1.551200  |
| H | -2.915700 | 0.423100  | -3.154900 |
| O | -0.230300 | -0.093400 | -2.066500 |
| H | -0.366400 | 0.347700  | -2.917600 |

**Intermediate F**

|    | Charge 2, Multiplicity 1 |          |           |
|----|--------------------------|----------|-----------|
| Fe | -1.528400                | 0.083800 | -0.644700 |
| Fe | 1.382100                 | 0.190600 | 0.324800  |
| O  | 0.956300                 | 0.000100 | -1.558700 |
| O  | -0.230300                | 0.462700 | -1.889000 |

|   |           |           |           |
|---|-----------|-----------|-----------|
| O | -0.416600 | -0.000300 | 0.752800  |
| C | -0.562100 | -2.621700 | -1.647300 |
| H | 0.031400  | -2.031700 | -2.336600 |
| C | -0.510500 | -4.009600 | -1.633500 |
| H | 0.134700  | -4.532300 | -2.329700 |
| C | -1.299400 | -4.698800 | -0.716400 |
| H | -1.283800 | -5.782900 | -0.680500 |
| C | -2.111500 | -3.980100 | 0.154500  |
| H | -2.755800 | -4.475200 | 0.872300  |
| C | -2.098800 | -2.591100 | 0.082300  |
| C | -3.013500 | -1.776500 | 0.997800  |
| H | -2.657800 | -1.786900 | 2.030400  |
| C | -4.851400 | -1.810400 | -0.258300 |
| H | -5.928400 | -1.973400 | -0.258200 |
| H | -4.399100 | -2.306700 | -1.128300 |
| C | -4.463500 | -0.328000 | -0.207600 |
| C | -4.324600 | 0.340300  | -1.576100 |
| H | -5.122300 | 0.002800  | -2.245000 |
| H | -4.375900 | 1.429500  | -1.484400 |
| C | -5.353500 | 0.467300  | 0.793300  |
| H | -5.644200 | 1.439000  | 0.375900  |
| H | -6.247100 | -0.084000 | 1.085500  |
| C | -3.231400 | 0.679900  | 1.518700  |
| H | -2.555700 | 0.475000  | 2.351000  |
| C | -2.909600 | 2.020000  | 0.849200  |
| C | -3.448400 | 3.209100  | 1.320600  |
| H | -4.080200 | 3.201100  | 2.201400  |
| C | -3.176900 | 4.383700  | 0.621300  |
| H | -3.584900 | 5.328100  | 0.964800  |
| C | -2.394100 | 4.329800  | -0.528200 |
| H | -2.171700 | 5.220200  | -1.104200 |
| C | -1.884100 | 3.099900  | -0.929000 |
| H | -1.252300 | 2.991200  | -1.806300 |
| N | -1.339400 | -1.934000 | -0.802000 |
| N | -3.130100 | -0.378300 | 0.491700  |
| N | -2.131900 | 1.980100  | -0.245100 |
| O | -4.309800 | -2.312900 | 0.956200  |
| O | -3.051200 | -0.047000 | -2.104300 |
| O | -4.556200 | 0.645400  | 1.961700  |
| H | -2.911100 | 0.362200  | -2.974200 |
| C | 0.813700  | 3.144300  | 0.480500  |
| H | -0.025700 | 2.823600  | 1.088800  |
| C | 1.064000  | 4.483600  | 0.206800  |
| H | 0.401700  | 5.246500  | 0.599000  |
| C | 2.170600  | 4.808800  | -0.571500 |
| H | 2.391600  | 5.843400  | -0.810600 |

|   |          |           |           |
|---|----------|-----------|-----------|
| C | 3.010300 | 3.791800  | -1.015600 |
| H | 3.909500 | 4.006300  | -1.581800 |
| C | 2.695600 | 2.478400  | -0.689000 |
| C | 3.679000 | 1.355800  | -1.025600 |
| H | 3.706700 | 1.142300  | -2.095800 |
| C | 4.946600 | 1.508400  | 0.801800  |
| H | 5.969300 | 1.538500  | 1.175600  |
| H | 4.340800 | 2.267200  | 1.316800  |
| C | 4.302900 | 0.120600  | 0.912000  |
| C | 3.566700 | -0.137300 | 2.228900  |
| H | 4.144700 | 0.260600  | 3.068700  |
| H | 3.410200 | -1.209100 | 2.382300  |
| C | 5.298500 | -1.013300 | 0.527700  |
| H | 5.198800 | -1.870500 | 1.204800  |
| H | 6.335000 | -0.676900 | 0.520400  |
| C | 3.584600 | -1.157500 | -0.924500 |
| H | 3.319000 | -1.098400 | -1.982400 |
| C | 2.771700 | -2.231200 | -0.198700 |
| C | 3.159700 | -3.564400 | -0.199100 |
| H | 4.037200 | -3.868700 | -0.758600 |
| C | 2.415600 | -4.469300 | 0.554100  |
| H | 2.695700 | -5.516800 | 0.579800  |
| C | 1.321100 | -4.013200 | 1.284400  |
| H | 0.727900 | -4.685600 | 1.892800  |
| C | 0.990300 | -2.665100 | 1.219800  |
| H | 0.147500 | -2.232200 | 1.749400  |
| N | 1.599400 | 2.167700  | 0.018100  |
| N | 3.336600 | 0.131900  | -0.243600 |
| N | 1.702700 | -1.803700 | 0.488300  |
| O | 4.963900 | 1.734100  | -0.601600 |
| O | 2.300800 | 0.533000  | 2.153100  |
| O | 4.957400 | -1.389600 | -0.803700 |
| H | 1.776600 | 0.343300  | 2.948700  |

### Intermediate G

|    | Charge 0, Multiplicity 1 |           |           |
|----|--------------------------|-----------|-----------|
| Fe | 1.282100                 | -0.025000 | -0.846000 |
| C  | 1.036500                 | 2.924300  | -1.746800 |
| H  | 0.476200                 | 2.532000  | -2.591500 |
| C  | 1.232800                 | 4.291200  | -1.590800 |
| H  | 0.818500                 | 4.985300  | -2.313000 |
| C  | 1.954400                 | 4.732200  | -0.486300 |
| H  | 2.119900                 | 5.791400  | -0.319200 |
| C  | 2.482200                 | 3.789900  | 0.390200  |
| H  | 3.088200                 | 4.086000  | 1.239500  |
| C  | 2.249100                 | 2.438000  | 0.149100  |
| C  | 2.956600                 | 1.399300  | 1.023700  |

|    |           |           |           |
|----|-----------|-----------|-----------|
| H  | 2.571700  | 1.413300  | 2.043400  |
| C  | 4.842100  | 1.168000  | -0.158000 |
| H  | 5.930400  | 1.129500  | -0.100400 |
| H  | 4.538100  | 1.778200  | -1.020700 |
| C  | 4.185700  | -0.216200 | -0.213500 |
| C  | 4.016400  | -0.774700 | -1.638700 |
| H  | 4.977600  | -0.696500 | -2.163000 |
| H  | 3.743900  | -1.833200 | -1.594200 |
| C  | 4.863100  | -1.223900 | 0.761600  |
| H  | 4.983000  | -2.206600 | 0.285800  |
| H  | 5.834800  | -0.878100 | 1.117900  |
| C  | 2.700100  | -1.051000 | 1.392700  |
| H  | 2.035900  | -0.750300 | 2.199600  |
| C  | 2.144700  | -2.266200 | 0.651900  |
| C  | 2.394400  | -3.558800 | 1.099200  |
| H  | 2.967500  | -3.712300 | 2.007000  |
| C  | 1.918400  | -4.627600 | 0.343800  |
| H  | 2.099500  | -5.648500 | 0.664800  |
| C  | 1.217600  | -4.369700 | -0.830700 |
| H  | 0.832000  | -5.174900 | -1.445900 |
| C  | 1.013300  | -3.045700 | -1.207700 |
| H  | 0.484600  | -2.757600 | -2.112500 |
| N  | 1.514000  | 2.019500  | -0.889100 |
| N  | 2.866500  | 0.047600  | 0.438500  |
| N  | 1.471000  | -2.026100 | -0.479800 |
| O  | 4.338200  | 1.714700  | 1.053700  |
| O  | 3.029000  | -0.022100 | -2.326300 |
| O  | 3.995600  | -1.318900 | 1.886200  |
| H  | 2.319500  | -0.562900 | -2.754900 |
| O  | 0.222100  | 0.135100  | 0.768900  |
| Fe | -1.627700 | -0.161000 | 1.185400  |
| C  | -1.381400 | -3.192400 | 1.345600  |
| H  | -0.995500 | -2.987800 | 2.340400  |
| C  | -1.603200 | -4.487700 | 0.893900  |
| H  | -1.373800 | -5.332600 | 1.533400  |
| C  | -2.120800 | -4.664400 | -0.387300 |
| H  | -2.313000 | -5.660600 | -0.773300 |
| C  | -2.382200 | -3.545100 | -1.167600 |
| H  | -2.792900 | -3.631600 | -2.167400 |
| C  | -2.129700 | -2.281100 | -0.636700 |
| C  | -2.422200 | -1.033900 | -1.469900 |
| H  | -1.614000 | -0.878000 | -2.197200 |
| C  | -4.609700 | -0.893000 | -1.084900 |
| H  | -5.587400 | -0.732300 | -1.541300 |
| H  | -4.665900 | -1.718800 | -0.361600 |
| C  | -4.039000 | 0.355900  | -0.410100 |

|   |           |           |           |
|---|-----------|-----------|-----------|
| C | -4.377700 | 0.450100  | 1.101800  |
| H | -5.462200 | 0.235900  | 1.197800  |
| H | -4.254400 | 1.512400  | 1.396800  |
| C | -4.307500 | 1.631700  | -1.252200 |
| H | -4.544400 | 2.482800  | -0.598700 |
| H | -5.108800 | 1.504700  | -1.982100 |
| C | -2.075500 | 1.415200  | -1.132700 |
| H | -1.162400 | 1.247400  | -1.708900 |
| C | -1.846400 | 2.405200  | 0.010200  |
| C | -1.798300 | 3.770700  | -0.252100 |
| H | -1.920200 | 4.123600  | -1.270600 |
| C | -1.594200 | 4.651700  | 0.804900  |
| H | -1.535700 | 5.720600  | 0.626900  |
| C | -1.472900 | 4.138000  | 2.092200  |
| H | -1.317800 | 4.784100  | 2.948600  |
| C | -1.564000 | 2.761300  | 2.265500  |
| H | -1.488700 | 2.317200  | 3.253600  |
| N | -1.650400 | -2.116400 | 0.600900  |
| N | -2.555700 | 0.149100  | -0.586700 |
| N | -1.740000 | 1.913500  | 1.251300  |
| O | -3.668900 | -1.186600 | -2.113800 |
| O | -3.598500 | -0.415400 | 1.829700  |
| O | -3.103000 | 1.888800  | -1.975700 |
| H | -2.492700 | -0.442600 | 3.205200  |
| O | -1.531900 | -0.615700 | 3.394800  |
| H | -1.214000 | 0.132200  | 3.920500  |
| O | 0.385900  | -0.447300 | -2.633800 |
| H | 0.224700  | 0.344900  | -3.166600 |

### Intermediate H

|    | Charge 0, Multiplicity 2 |           |           |
|----|--------------------------|-----------|-----------|
| Fe | 0.019500                 | -1.430000 | -0.228500 |
| O  | -0.017800                | -1.447600 | -2.083100 |
| C  | 3.005800                 | -1.929900 | 0.031700  |
| H  | 2.694400                 | -2.946800 | 0.251000  |
| C  | 4.341300                 | -1.554100 | 0.086400  |
| H  | 5.098400                 | -2.282100 | 0.352600  |
| C  | 4.668400                 | -0.233300 | -0.202800 |
| H  | 5.700000                 | 0.100600  | -0.165600 |
| C  | 3.654800                 | 0.656600  | -0.542700 |
| H  | 3.861600                 | 1.695100  | -0.772500 |
| C  | 2.340700                 | 0.200800  | -0.577200 |
| C  | 1.212500                 | 1.148400  | -1.009300 |
| H  | 1.073100                 | 1.062100  | -2.090100 |
| C  | 1.175900                 | 2.616000  | 0.676100  |
| H  | 1.094300                 | 3.679200  | 0.904400  |
| H  | 1.924500                 | 2.147000  | 1.326900  |

|   |           |           |           |
|---|-----------|-----------|-----------|
| C | -0.157800 | 1.864100  | 0.788200  |
| C | -0.364600 | 1.217500  | 2.159800  |
| H | -0.471200 | 2.020700  | 2.903200  |
| H | -1.319700 | 0.668200  | 2.134800  |
| C | -1.376600 | 2.719800  | 0.358800  |
| H | -2.247300 | 2.491100  | 0.990200  |
| H | -1.182500 | 3.792700  | 0.394800  |
| C | -1.266000 | 1.017000  | -1.107000 |
| H | -1.064100 | 0.784300  | -2.154000 |
| C | -2.372900 | 0.091700  | -0.588500 |
| C | -3.698300 | 0.508800  | -0.559000 |
| H | -3.947300 | 1.512800  | -0.883000 |
| C | -4.669000 | -0.377900 | -0.101100 |
| H | -5.710900 | -0.077400 | -0.065300 |
| C | -4.285000 | -1.648700 | 0.313700  |
| H | -5.007600 | -2.366900 | 0.682400  |
| C | -2.938000 | -1.987000 | 0.254600  |
| H | -2.575500 | -2.957500 | 0.576900  |
| N | 2.030400  | -1.073400 | -0.290800 |
| N | -0.047300 | 0.845400  | -0.302200 |
| N | -2.008300 | -1.137900 | -0.191100 |
| O | 1.541500  | 2.477100  | -0.694200 |
| O | 0.696600  | 0.385200  | 2.518100  |
| O | -1.639300 | 2.365800  | -0.992900 |
| H | 0.446300  | -0.545500 | 2.211800  |
| O | 0.020900  | -1.967700 | 1.637800  |
| H | 0.861500  | -2.396400 | 1.857800  |

### Intermediate I

|    | Charge 1, Multiplicity 1 |           |           |
|----|--------------------------|-----------|-----------|
| Fe | 0.063700                 | -1.147000 | -0.114800 |
| O  | 0.082400                 | -1.337100 | -1.705900 |
| O  | -0.069600                | -2.717300 | 0.718900  |
| H  | 0.799000                 | -3.092100 | 0.926800  |
| C  | 3.026400                 | -1.788300 | 0.078300  |
| H  | 2.709900                 | -2.790400 | 0.345000  |
| C  | 4.373800                 | -1.475000 | -0.032600 |
| H  | 5.120200                 | -2.236400 | 0.157200  |
| C  | 4.730300                 | -0.178200 | -0.388100 |
| H  | 5.774000                 | 0.102300  | -0.478000 |
| C  | 3.728900                 | 0.755700  | -0.631700 |
| H  | 3.958000                 | 1.778700  | -0.907700 |
| C  | 2.403700                 | 0.357800  | -0.512400 |
| C  | 1.291800                 | 1.361700  | -0.807400 |
| H  | 1.210300                 | 1.543500  | -1.881900 |
| C  | 1.106400                 | 2.359000  | 1.177700  |
| H  | 1.038200                 | 3.321100  | 1.683900  |

|   |           |           |           |
|---|-----------|-----------|-----------|
| H | 1.798700  | 1.699300  | 1.718300  |
| C | -0.254700 | 1.682400  | 0.982900  |
| C | -0.661800 | 0.762000  | 2.127500  |
| H | -0.458300 | 1.239500  | 3.091400  |
| H | -1.726200 | 0.512100  | 2.072900  |
| C | -1.358800 | 2.683500  | 0.542400  |
| H | -2.300700 | 2.480800  | 1.065200  |
| H | -1.070500 | 3.722200  | 0.702600  |
| C | -1.204700 | 1.160600  | -1.111900 |
| H | -0.960500 | 1.031800  | -2.168500 |
| C | -2.320800 | 0.210200  | -0.687100 |
| C | -3.659500 | 0.539600  | -0.824300 |
| H | -3.939000 | 1.503100  | -1.235600 |
| C | -4.611500 | -0.391100 | -0.411200 |
| H | -5.668300 | -0.165200 | -0.503400 |
| C | -4.195900 | -1.606000 | 0.124300  |
| H | -4.910200 | -2.348900 | 0.458100  |
| C | -2.832900 | -1.857700 | 0.238400  |
| H | -2.427800 | -2.774700 | 0.653000  |
| N | 2.065500  | -0.887800 | -0.149300 |
| N | -0.015700 | 0.863600  | -0.266300 |
| N | -1.930200 | -0.959900 | -0.159500 |
| O | 1.540500  | 2.574400  | -0.158700 |
| O | 0.136900  | -0.403300 | 1.962300  |
| O | -1.514600 | 2.492800  | -0.861800 |
| H | -0.209200 | -1.147600 | 2.484700  |
